# Supplementary material for: Combining HPV DNA load with p16/Ki-67 staining to detect cervical precancerous lesions and predict the progression of CIN1–2 lesions
Source: Virol J. 2019 Oct 16;16:117. doi: 10.1186/s12985-019-1225-6 (PMC6794830; doi:10.1186/s12985-019-1225-6)
Supplement: Supplementary file 1 — Additional file 1: Table S1. Dignoses, qRT-PCR amplifications and immunostaining analyses of the 350 cases. [file 12985_2019_1225_MOESM1_ESM.xlsx]

## Sheet: Diagnosis and qRT-PCR results 
Patient number	Patient year	HPV qPCR CT value														Histopathology diagnosis
		HPV-16	HPV-56	HPV-31	HPV-18	HPV-52	HPV-58	HPV-68	HPV-35	HPV-45	HPV-33	HPV-39	HPV-51	HPV-59	Referance
1	52	22.21													23.55	CIN2-3, gland involved
2	60	19.74										28.63			19.91	cervical squamous cell carcinoma
3	44															hyperplasia, squamous metaplasia
4	31															CIN1
5	48						30.05								26	CIN1
6	28															CIN1
7	54	19.15													21.45	keratinizing squamous cell carcinoma of cervix
8	48															invasive adenocarcinoma of the cervix
9	54	22										24			21	CIN2-3
10	49					22.6									18.61	cervicitis, hyperplasia
11	38					24.45									19.91	CIN1
12	43						22				26				23.5	CIN2-3
13	36					29.2									23.07	cervicitis, hyperplasia
14	35															CIN2-3
15	31	20.88											39.28		23.2	CIN3
16	37						22								24.11	CIN3
17	54	18.91													20.96	CIN3
18	53	18.36						23.55							20.51	CIN2
19	54															CIN2
20	46	23					24.5				27				21.9	CIN2
21	41	19.82													21.4	CIN2-3
22	60	19.97													22.8	CIN3
23	32	21.26													25.1	CIN3
24	29	23.3			33.75			35.65							21	CIN2-3, gland involved
25	42					19.18									21.25	CIN2
26	64															CIN1
27	43					25.5									23	CIN2
28	44						20								24.75	CIN1-2
29	37					34.2									22.21	cervicitis, hyperplasia
30	42	24.22													20.08	CIN3, gland involved
31	38											25			24.87	cervicitis, hyperplasia
32	43										19.28				22.14	CIN2-3
33	44					30.71			18.5					25.14	23.73	CIN2-3
34	52						24								17	CIN1
35	44						16.5	23.92							21.22	CIN2
36	60															hyperplasia
37	47	17.63													21.42	CIN2-3, gland involved
38	47															cervicitis, hyperplasia
39	46	20.78													23.58	CIN3, gland involved
40	36										17.13			32.36	21	CIN3, gland involved
41	53						17.35								21.38	CIN2
42	52															cervicitis, hyperplasia
43	42															CIN1
44	39						18.22								20	CIN2
45	48						20.85								24.52	CIN1
46	46														22	CIN2
47	23															CIN2
48	47	17.91													20.23	moderately differentiated squamous cell carcinoma of cervix
49	31															CIN2
50	49														24.85	CIN1
51	47	25.52													24.55	CIN2-3
52	37															CIN1
53	54	18.32		20.25											20.82	CIN2-3
54	39					20.48									22.44	CIN2
55	56			27.19						36.2			25.33		23.53	CIN2
56	47	21.89													22.52	CIN3
57	56						18.47								22.29	CIN3, gland involved
58	63	18.27													20.46	CIN3, invasive
59	40	33.36				25.51									20.73	cervicitis, hyperplasia
60	44							20.34							23.4	CIN1
61	42	20.2					21								19.8	CIN3
62	40	26.12													24.52	cervical squamous cell carcinoma, mlid invasive
63	31			25.6											23	CIN1
64	66		20.3		26	27			24.77				22.35		22.73	cervicitis, hyperplasia
65	41	22.3													20.73	CIN2-3, gland involved
66	33						13.81								20.52	CIN2-3, gland involved
67	41	12.96											32.06		19.63	CIN3
68	30	20													21	CIN2-3
69	53														.	CIN1
70	46	20.89				23.17									20.24	CIN1
71	61						16.8								20.97	cervical squamous cell carcinoma
72	53															cervicitis, hyperplasia
73	35					25									22	cervicitis, hyperplasia
74	51												27		21	cervicitis
75	28							24				14.16			20.41	cervicitis
76	36	17													23.27	CIN3, gland involved
77	43					21.9									22.75	CIN3, gland involved
78	52															cervicitis
79	39															CIN2
80	50										27.87				23.3	cervicitis
81	45															Cervical cancer
82	47	22.84					19.94								23.6	CIN2-3
83	43					27.58									23.77	CIN1
84	40															cervicitis, erosion with squamous metaplasia
85	21							20.7				34.91			22.78	CIN1
86	53	19.79													21.48	CIN2-3, gland involved
87	35						21.56								19.52	cervicitis
88	44					28.17	25								18.34	CIN1
89	24						19.53								17.88	CIN2, gland involved
90	32	20.17								26.17					19.5	CIN2-3, gland involved
91	53								20.41						23.28	CIN3, gland involved
92	36	17.59													20.18	CIN3
93	44	26.14					16.07								21.61	CIN3, mild invasive
94	54	20.68													21.9	CIN1
95	26															cervicitis, hyperplasia
96	41															CIN1
97	30	19.16	25.64				20.97							31.26	22.52	CIN3
98	32										21.44				22.94	CIN1
99	27			13.12											21.91	CIN2-3
100	51	23.35													23.6	CIN3, gland involved
101	40		22.61												28.07	CIN1
102	40										19.75				22.12	CIN2-3
103	42	26	32.52						24.9						23.56	hyperplasia
104	53															CIN1
105	46	22.14													20.91	cervical squamous cell carcinoma
106	28															CIN1
107	40															cervicitis with squamous metaplasia
108	56					23.51			20						22.42	cervicitis and erosion
109	46	17.11													20.48	CIN3, mild invasive
110	36						23.8	35.27					35.25		20.42	focal CIN2
111	27	35					24.71								27.67	CIN1
112	24					29.4									22.43	cervicitis
113	46															hyperplasia
114	33												27.58		25.65	focal CIN2
115	44	19.93													24.83	CIN2
116	43															CIN1
117	42															CIN2
118	64	20.53									27.72				22.4	cervicitis
119	45			17.88											19.42	cervicitis
120	50															CIN1
121	34	22.4													22.96	CIN2-3
122	45				28.06										24.25	CIN2
123	41						29.5								27.13	focal CIN1
124	36						33.27		31.05						26.44	cervicitis, moderate cervical erosion
125	49							38							21.48	cervical squamous cell carcinoma
126	41															CIN1
127	46															CIN2-3, gland involved
128	48	14					13.22								18.71	CIN2-3
129	45			25.32											23.27	cervicitis with squamous metaplasia
130	35	16.23													19.2	cervical squamous cell carcinoma
131	35	16.58													17.17	CIN3
132	47	22.45													22.33	invasive squamous cell carcinoma of the cervix
133	52	18.99													20.74	CIN2
134	36	17.84													20	CIN3
135	44	21.53		23.11											19.74	chronic cervicitis, CIN1
136	40						15.24								20.68	CIN3, gland involved
137	38	23.69													21.43	CIN2-3
138	40	19.71													19	CIN3, gland involved
139	64					28.77			33.7		28.8	24.56			23.37	cervicitis
140	46	32.14													22.58	cervicitis with squamous metaplasia
141	45						32.33								22.66	CIN1
142	53	20.4													22.414	cervical squamous cell carcinoma
143	28	22.75					16.24				25.45				23.55	CIN2-3
144	30	21.48													23.53	CIN3, gland involved
145	42															cervicitis
146	45												15.23		21.21	CIN1
147	48					18.18					23.38				21.47	CIN2-3, gland involved
148	60	23.18													23.3	CIN2-3
149	48				23.41	28.12									21.23	CIN2
150	51						21.25								21.16	CIN2
151	42					24.2									20.46	CIN3, gland involved
152	52			23.98		27.27									21.63	cervicitis
153	39	22.63							25.8						24.38	CIN2, koilocytosis in the upper epidermis
154	46					26.23									24.7	CIN1
155	38															CIN1
156	48	19.08													21.61	non keratinized cervical carcinoma
157	44	22.58													21.5	CIN2-3, with koilocytosis in the upper epidermis
158	30	26.66													27.95	CIN2_3, gland involved
159	55	22.45								31.44				25.25	23.78	cervicitis
160	59	17.98				30.77									20.41	cervical carcinoma
161	35	18.04													19.41	cervical squamous cell carcinoma
162	42															cervical erosion, CIN1
163	39						18.22								20.27	CIN2, cervicitis
164	47															cervicitis, erosion with squamous metaplasia
165	32	19.85									29.46				22.11	cervical squamous cell carcinoma
166	42															cervical hypertrophy, erosion and nabothian cysts
167	27	20.03					25.86								20.81	CIN1, gland involved
168	54						21.08								21.36	cervicitis
169	51															cervicitis, hyperplasia
170	47													22.38	21.27	CIN2
171	37															CIN1
172	35										24.55				24.03	focal CIN2
173	45	21.26													19.57	focal CIN2, gland involved
174	43															cervical carcinoma
175	34					29.7									21	CIN1
176	42										22.29				22.26	CIN3
177	44															cervicitis with squamous metaplasia
178	46		31									34			23.46	CIN1
179	50															cervicitis with squamous metaplasia
180	51											23.23	22.94	23.35	20.73	cervicitis
181	37															normal
182	35															yanzheng
183	48				24.1										22.7	cervicitis, hyperplasia
184	34															cervicitis, hyperplasia
185	48					21.4									22	CIN2
186	47	26.03													26.19	CIN2-3
187	33															CIN2
188	58					25			27					28	23	focal CIN2
189	37	22													19.7	focal CIN2
190	49			23											20.41	CIN1-3
191	49															cervicitis
192	44	22.57													22.11	cervical carcinoma
193	38	28.18				20.76									20.46	cervicitis
194	50					26.55									24.5	CIN3
195	23	26.51													21.27	focal CIN2-3
196	38	24.14													21.15	focal CIN2-3
197	46						27.37								26.53	cervicitis
198	34				30.2										22.73	cervicitis
199	57						35								25.26	cervicitis
200	33				25.05										21.85	cervical carcinoma
201	38	27													24	CIN2-3
202	50	14.55				32.76									21.23	cervical carcinoma
203	36	33.9												17.12	22.23	CIN1
204	40	20		·											19	CIN2-3
205	53	16.91		36.28											20.1	CIN2-3, gland involved
206	51															focal CIN1
207	42	34.48													26.26	cervicitis
208	40								29.75						26.84	cervicitis, CIN1
209	28	30.66													27.69	focal CIN2
210	41	20.4													21	cervical carcinoma
211	38				34.29										25.02	cervicitis
212	32	22.3			38.97						31.97				21.1	cervicitis
213	37												24.58		24.5	CIN3, gland involved
214	51															cervicitis, hyperplasia
215	47															cervicitis, hyperplasia
216	54	28.58				31.09									24.82	CIN1
217	61															hyperplasia
218	38	18.09													19.75	focal CIN2
219	34	28.34		23.85		30.78									22.25	CIN1
220	49															cervicitis
221	49	21.3	27.4	18.91											26.1	CIN2
222	66	33.22													24.8	cervicitis
223	44	28													19.6	cervicitis, hyperplasia
224	21				30							35			22	cervicitis, hyperplasia
225	43						22.29								27.09	CIN2
226	40	22.46				22									23.23	CIN2-3
227	64	13.71													19.98	cervical carcinoma
228	39															polyp
229	63	22													24	focal CIN2, gland involved
230	34										24.25				24.98	focal CIN2-3
231	47	23.56					20.24								25.6	focal CIN2, gland involved
232	51						20								21.6	CIN2
233	51															hyperplasia
234	46															cervicitis
235	32	28.26					28.35								24.23	focal CIN2
236	52	20													22	CIN2
237	32	19.21													22.91	CIN2
238	50					22.55									19.38	cervicitis
239	43															focal CIN2
240	65								19.35						24.33	focal CIN2
241	54															CIN1
242	42															focal CIN1
243	41															polyp
244	67					25.16	12.26								17.23	focal CIN2
245	53	17													23.23	cervical carcinoma
246	51	13													20	CIN1-2
247	42	15.67													20.96	cervical carcinoma
248	40					31.54	19.97								20.5	focal CIN3, gland involved
249	50				33.04							27.04			22	hyperplasia
250	72	27													21	hyperplasia
251	39															focal CIN2
252	45	24.71													23.3	focal CIN1
253	26	23.27													21.58	focal CIN1
254	47															cervicitis
255	31			21.07											23.61	focal CIN1
256	41				23.15										23.3	cervical carcinoma
257	46	23				27									25.91	CIN2
258	35	17.65													23.59	CIN3, gland involved
259	29						15.37								20.26	CIN1
260	43						17.48								23.63	focal CIN2
261	36	21.76													25.71	CIN3, gland involved
262	50	26													24	CIN2
263	49			29			20								23	CIN2-3
264	52	19.5													23	cervical carcinoma
265	51	20.93													21.86	CIN3, gland involved
266	34	21.52													24.17	CIN3, gland involved
267	48				27.72	37.54									22.91	hyperplasia
268	31						15.63								21.24	CIN2
269	48	18													16.2	cervicitis
270	41						20.42	37.31							20	CIN3, gland involved
271	55	22.65													22.62	cervical carcinoma
272	38															focal CIN2
273	43															CIN1
274	47												29.3		26.7	cervicitis, polyp
275	42						28.92								25.22	cervicitis, hyperplasia
276	49					38.78									25.71	CIN1
277	27											21.22			24.43	CIN2
278	44															CIN2
279	30	24													24.79	focal CIN3
280	30	24.95				28.68									23.87	CIN3
281	54	17.64													21.5	cervical carcinoma
282	54	35.28													24	polyp
283	41	19.74					33.73								17.18	CIN3
284	54	16													20	cervical carcinoma
285	41	26													22	cervicitis
286	36	21													22	CIN2-3
287	40	19													24	cervical carcinoma
288	40					37.57									20.83	CIN2-3
289	38	18													19.2	CIN2-3
290	45															CIN1
291	38										15.72		18.89		21.24	CIN2
292	54					31							20.85		25.52	focal CIN3
293	25															mild atypical hyperplasia
294	62	30.42													26.48	focal CIN2
295	42						35.52								21.93	focal CIN1
296	43															hyperplasia
297	38	12.9													19.28	focal CIN2
298	32	32.5													23.4	focal CIN1
299	33					25.31									21.52	CIN1
300	43															hyperplasia
301	42	26.3			32.88	39.31									22.67	focal CIN1
302	49	23.7				19.9	19	20.54					25.39		23.14	focal CIN1
303	53					31.37									20.44	cervicitis with koilocytosis in the upper epidermis
304	31															focal CIN1
305	35	23													22.5	focal CIN2
306	55						14.52								18.92	CIN3
307	34		31.96			38.39	35.36								23.29	hyperplasia
308	46	18.6					29.92								22.03	CIN2-3
309	43			21											27.2	focal CIN1
310	44		15.4												21.13	CIN1
311	46	24					18								22	CIN3
312	51															CIN1
313	50															polyp
314	36						27.23								23.04	CIN1, focal
315	51	20.5													22	CIN3
316	38	27.65				24.32									26.42	CIN1
317	37	20							27.62						20.27	focal CIN2
318	69	15.91							27.1						19.12	carcinoma in situ
319	52	18.63													18.88	adenocarcinoma of the cervix
320	48															polyp
321	64															focal CIN1
322	66	18.54													22.49	cervical squamous cell carcinoma
323	51															hyperplasia
324	43					17.98									22.34	focal CIN1
325	42	17.76													20	CIN2-3, gland involved
326	50			21.23			19.69								22.49	CIN2-3, gland involved
327	33					30.18					27.2		23.8		22.74	CIN2
328	21				16.85								14.54		20.96	hyperplasia
329	48	25													28	CIN3
330	42		39.36				25.8								20.3	hyperplasia
331	24															CIN1
332	41					27.7	22								27	CIN2
333	50					26.56					21.65				22.42	CIN2
334	46	23.67			29.74										20	CIN2
335	50	25.83													21.84	CIN1
336	44						33.04								29.14	CIN1
337	59															CIN1
338	30														30.12	CIN1
339	30														30.12	CIN2
340	42	21.23													20.9	CIN1
341	50						19.36								22.79	CIN1
342	42					25									24	CIN1
343	45						24.51								20.85	hyperplasia
344	41							27.9				17.25			24.3	CIN1
345	65					33.31									22.44	CIN3
346	47	18.17	21.86			24.76	18.74					30			21.47	CIN1
347	37										18.22				24.19	CIN2
348	37										19				24.19	CIN1
349	20					31.59									25	CIN1
350	30	23.78													22	CIN3

## Sheet: P-16 immunostaining
		Staining area（%）										Staining intensity (0-3)										Score
Patient number	Patient year	Field 1	Field 2	Field 3	Field 4	Field 5	Field 6	Field 7	Field 8	Field 9	Field 10	Field 1	Field 2	Field 3	Field 4	Field 5	Field 6	Field 7	Field 8	Field 9	Field 10	Field 1	Field 2	Field 3	Field 4	Field 5	Field 6	Field 7	Field 8	Field 9	Field 10	Avergae
1	52	100	100	100	100	99	100	99	98	100	100	3	3	3	3	2	3	2	2	3	3	12	12	12	12	8	12	8	8	12	12	10.8
2	60	100	100	90	90	95	98	95	95	100	96	3	3	2	3	3	2	3	3	3	3	12	12	8	12	12	8	12	12	12	12	11.2
3	44	0	0	0	0	3	1	10	20	0	3	0	0	0	0	0	1	1	1	0	1	0	0	0	0	0	0	1	1	0	0	0.2
4	31	2	7	10	0	0	5	4	0	0	3	1	2	2	0	0	1	1	0	0	1	0	2	2	0	0	1	0	0	0	0	0.5
5	48	28	35	37	30	26	35	38	40	29	32	2	2	2	2	2	2	2	2	2	2	4	4	4	4	4	4	4	4	4	4	4
6	28	0	10	7	12	20	12	11	0	5	4	0	1	1	1	1	1	1	0	1	1	0	1	1	1	1	1	1	0	1	0	0.7
7	54	95	82	90	100	100	95	96	98	98	99	2	2	3	3	2	3	2	2	3	3	8	8	12	12	8	12	8	8	12	12	10
8	48	60	71	45	75	55	50	45	42	62	65	3	3	3	3	3	3	3	3	3	3	9	9	6	9	6	6	6	6	9	9	7.5
9	54	75	70	100	72	90	85	99	95	82	94	3	3	3	3	2	3	3	2	3	2	9	6	12	9	8	12	12	8	12	8	9.6
10	49	15	12	20	6	9	7	7	10	10	11	1	1	1	1	1	1	1	1	1	1	1	1	1	1	1	1	1	1	1	1	1
11	38	84	85	70	75	77	80	82	85	74	75	3	3	2	2	2	2	3	2	2	2	12	12	6	6	8	8	12	8	6	6	8.4
12	43	99	95	99	92	98	90	95	90	92	99	3	3	3	3	3	3	3	3	3	3	12	12	12	12	12	12	12	12	12	12	12
13	36	46	50	55	42	40	42	45	45	47	52	2	1	2	2	2	2	1	2	2	2	4	2	6	4	4	4	2	4	4	6	4
14	35	80	90	65	100	92	90	85	86	94	97	3	3	3	3	3	3	3	3	3	3	12	12	9	12	12	12	12	12	12	12	11.7
15	31	83	90	95	97	90	90	82	85	83	85	3	3	3	3	3	3	3	3	3	3	12	12	12	12	12	12	12	12	12	12	12
16	37	100	65	91	100	100	70	75	85	90	95	3	3	3	3	3	3	3	3	3	3	12	9	12	12	12	9	9	12	12	12	11.1
17	54	91	90	100	95	100	95	90	100	95	95	3	3	3	2	2	3	2	2	2	3	12	12	12	8	8	12	8	8	8	12	10
18	53	70	50	45	20	45	40	42	65	60	55	1	1	2	1	1	1	2	1	1	1	3	2	4	4	2	2	4	3	3	3	3
19	54	70	65	40	55	45	50	50	62	65	60	1	1	1	1	1	1	1	1	1	1	3	3	2	3	2	2	2	3	3	3	2.6
20	46	0	0	0	0	0	0	0	0	0	0	0	0	0	0	0	0	0	0	0	0	0	0	0	0	0	0	0	0	0	0	0
21	41	90	90	80	95	85	92	95	95	85	90	2	2	2	3	3	3	2	2	3	2	8	8	8	12	12	12	8	8	12	8	9.6
22	60	60	75	78	90	77	82	85	80	75	72	2	2	2	2	2	2	2	2	2	2	6	6	8	8	8	8	8	8	6	6	7.2
23	32	88	98	80	95	85	90	95	95	85	82	3	3	3	2	3	3	3	2	3	3	12	12	12	8	12	12	12	8	12	12	11.2
24	29	0	0	0	0	0	0	0	0	0	0	0	0	0	0	0	0	0	0	0	0	0	0	0	0	0	0	0	0	0	0	0
25	42	20	95	70	50	55	45	75	60	45	50	2	3	3	2	3	2	2	3	3	3	4	12	9	6	9	4	6	9	6	6	7.1
26	64	0	0	0	0	0	0	0	0	0	0	0	0	0	0	0	0	0	0	0	0	0	0	0	0	0	0	0	0	0	0	0
27	43	0	0	0	0	0	0	0	0	0	0	0	0	0	0	0	0	0	0	0	0	0	0	0	0	0	0	0	0	0	0	0
28	44	100	100	100	95	97	99	95	99	99	100	1	2	1	2	2	1	1	2	2	2	4	8	4	8	8	4	4	8	8	8	6.4
29	37	0	0	0	0	0	0	0	0	0	0	0	0	0	0	0	0	0	0	0	0	0	0	0	0	0	0	0	0	0	0	0
30	42	0	0	0	0	0	0	0	0	0	0	0	0	0	0	0	0	0	0	0	0	0	0	0	0	0	0	0	0	0	0	0
31	38	0	0	0	0	0	0	0	0	0	0	0	0	0	0	0	0	0	0	0	0	0	0	0	0	0	0	0	0	0	0	0
32	43	95	100	92	100	100	92	95	95	100	98	2	2	2	1	2	1	2	2	2	2	8	8	8	4	8	4	8	8	8	8	10
33	44	82	100	99	100	100	95	85	95	100	100	3	3	3	2	2	3	3	2	3	3	12	12	12	8	8	12	12	8	12	12	10.8
34	52	90	85	75	90	95	90	88	87	95	96	1	1	1	1	1	1	1	1	1	1	4	4	3	4	4	4	4	4	4	4	3.9
35	44	35	50	40	50	60	55	54	45	50	60	1	2	2	2	1	1	2	2	1	2	2	4	4	4	3	3	6	4	2	6	3.8
36	60	40	55	15	17	10	35	12	17	15	15	1	1	1	1	1	1	1	1	1	1	2	3	1	1	1	2	1	1	1	1	1.4
37	47	100	97	100	100	100	95	97	99	100	98	2	2	3	3	3	2	3	3	2	2	8	8	12	12	12	8	12	12	8	8	10
38	47	0	0	0	0	0	0	0	0	0	0	0	0	0	0	0	0	0	0	0	0	0	0	0	0	0	0	0	0	0	0	0
39	46	100	100	100	95	98	100	95	95	97	75	3	2	2	3	2	3	3	3	3	3	12	8	8	12	8	12	12	12	12	9	10.5
40	36	5	15	0	0	20	12	0	11	8	9	1	1	0	0	1	1	0	1	1	1	1	1	0	0	1	1	0	1	1	1	0.7
41	53	76	55	85	70	79	88	90	95	90	85	3	3	3	3	3	3	3	3	3	3	12	9	12	9	12	12	12	12	12	12	11.4
42	52	70	30	35	45	35	30	40	45	42	47	3	1	1	1	1	1	1	1	1	1	9	2	2	2	2	2	2	2	2	2	2.7
43	42	2	2	0	0	2	0	12	0	4	6	1	1	0	0	1	0	1	0	1	1	0	0	0	0	0	0	1	0	0	1	0.2
44	39	65	70	70	65	68	55	74	77	60	49	2	2	2	3	3	2	2	2	2	2	6	6	6	9	9	6	6	6	6	4	6.4
45	48	62	51	70	65	85	69	52	55	65	49	3	3	3	3	3	3	3	3	3	3	9	9	9	9	12	9	9	9	9	6	9
46	46	0	0	0	0	0	0	0	0	0	0	0	0	0	0	0	0	0	0	0	0	0	0	0	0	0	0	0	0	0	0	0
47	80	85	82	81	77	84	67	72	88	82	80	3	3	2	3	2	2	2	3	3	3	12	12	8	12	8	6	6	12	12	12	10
48	47	100	95	90	98	98	95	97	100	95	96	3	3	3	3	3	3	3	3	3	3	12	12	12	12	12	12	12	12	12	12	12
49	31	88	80	95	98	98	92	85	89	94	97	3	3	3	3	3	3	3	3	3	3	12	12	12	12	12	12	12	12	12	12	12
50	49	60	24	45	17	15	17	33	0	27	20	2	2	1	1	2	2	1	0	2	1	6	2	2	1	2	2	2	0	4	1	2.2
51	47	100	95	100	100	90	92	96	97	99	100	3	3	3	3	3	3	3	3	3	3	12	12	12	12	12	12	12	12	12	12	12
52	37	0	0	0	0	0	0	0	0	0	0	0	0	0	0	0	0	0	0	0	0	0	0	0	0	0	0	0	0	0	0	0
53	54	80	82	75	65	47	55	74	70	80	72	2	2	2	2	2	2	2	2	2	2	8	8	6	6	4	6	6	6	8	6	6.4
54	39	88	85	78	85	92	90	82	77	92	90	2	3	3	3	3	3	3	2	3	3	8	12	12	12	12	12	12	8	12	12	11.2
55	56	30	21	25	15	33	32	30	30	25	29	3	3	3	3	3	3	3	3	3	3	6	3	3	3	6	6	6	6	3	6	4.8
56	47	80	92	92	80	92	90	95	90	75	75	2	2	2	2	2	2	2	2	2	2	8	8	8	8	8	8	8	8	6	6	7.6
57	56	10	30	10	52	70	30	21	17	22	25	1	2	2	2	2	2	2	2	2	2	1	4	2	6	6	4	2	2	2	2	3.1
58	63	90	92	95	100	88	90	95	85	98	96	1	1	2	2	2	2	1	2	2	1	4	4	8	8	8	8	4	8	8	4	6.4
59	40	0	0	0	0	0	0	0	0	0	0	0	0	0	0	0	0	0	0	0	0	0	0	0	0	0	0	0	0	0	0	0
60	44	0	0	0	0	0	0	0	0	0	0	0	0	0	0	0	0	0	0	0	0	0	0	0	0	0	0	0	0	0	0	0
61	42	55	87	90	70	72	75	70	82	85	87	2	2	2	2	2	2	2	2	2	2	6	8	8	6	6	6	6	8	8	8	7
62	40	85	92	90	95	90	88	87	89	92	85	2	2	2	3	2	2	2	3	3	2	8	8	8	12	8	8	8	12	12	8	9.2
63	31	4	11	7	6	0	7	9	12	0	0	1	1	1	1	0	1	1	1	0	0	0	1	1	1	0	1	1	1	0	0	0.6
64	66	0	0	0	0	0	0	0	0	0	0	0	0	0	0	0	0	0	0	0	0	0	0	0	0	0	0	0	0	0	0	0
65	41	98	98	97	96	92	92	90	94	95	99	3	3	2	2	2	2	2	3	2	2	12	12	8	8	8	8	8	12	8	8	9.2
66	33	0	0	0	0	0	0	0	0	0	0	0	0	0	0	0	0	0	0	0	0	0	0	0	0	0	0	0	0	0	0	0
67	41	90	92	95	100	88	90	95	85	98	96	3	3	2	2	2	2	3	2	2	3	12	12	8	8	8	8	12	8	8	12	9.6
68	30	70	55	95	91	82	80	70	65	68	78	2	2	1	2	2	2	2	1	2	2	6	6	4	8	8	8	6	3	6	8	6.3
69	53	0	0	0	0	0	0	0	0	0	0	0	0	0	0	0	0	0	0	0	0	0	0	0	0	0	0	0	0	0	0	0
70	46	0	0	0	0	0	0	0	0	0	0	0	0	0	0	0	0	0	0	0	0	0	0	0	0	0	0	0	0	0	0	0
71	61	97	100	90	98	92	90	95	98	99	100	2	2	2	2	2	2	2	2	2	2	8	8	8	8	8	8	8	8	8	8	8
72	53	0	0	0	0	0	0	0	0	0	0	0	0	0	0	0	0	0	0	0	0	0	0	0	0	0	0	0	0	0	0	0
73	35	0	0	0	0	0	0	0	0	0	0	0	0	0	0	0	0	0	0	0	0	0	0	0	0	0	0	0	0	0	0	0
74	51	20	35	5	0	0	0	17	0	0	15	1	1	1	0	0	0	1	0	0	1	1	2	1	0	0	0	1	0	0	1	0.6
75	28	10	0	0	20	0	7	0	0	0	0	1	0	0	1	0	1	0	0	0	0	1	0	0	1	0	1	0	0	0	0	0.3
76	36	90	87	96	98	92	95	99	98	90	92	3	3	3	3	2	3	3	3	2	3	12	12	12	12	8	12	12	12	8	12	11.2
77	43	100	100	100	95	97	95	96	98	99	93	3	3	3	3	3	3	3	3	3	3	12	12	12	12	12	12	12	12	12	12	12
78	52	8	9	15	70	11	7	6	0	11	15	1	2	2	3	2	2	2	0	2	0	1	2	2	9	2	2	2	0	2	0	2.2
79	39	91	85	95	100	100	95	98	99	100	92	2	2	2	2	2	2	2	2	2	2	8	8	8	8	8	8	8	8	8	8	8
80	50	0	0	0	0	0	0	0	0	0	0	0	0	0	0	0	0	0	0	0	0	0	0	0	0	0	0	0	0	0	0	0
81	45	100	100	95	96	90	92	98	99	100	95	2	2	2	2	2	2	2	2	2	2	8	8	8	8	8	8	8	8	8	8	8
82	47	70	100	65	90	100	78	85	92	85	88	2	2	2	1	2	3	2	2	2	2	6	8	6	4	8	12	8	8	8	8	7.6
83	43	0	0	0	0	0	0	0	0	0	0	0	0	0	0	0	0	0	0	0	0	0	0	0	0	0	0	0	0	0	0	0
84	40	0	0	0	0	0	0	0	0	0	0	0	0	0	0	0	0	0	0	0	0	0	0	0	0	0	0	0	0	0	0	0
85	21	0	0	0	0	0	0	0	0	0	0	0	0	0	0	0	0	0	0	0	0	0	0	0	0	0	0	0	0	0	0	0
86	53	100	100	100	100	100	100	100	100	100	100	3	3	3	3	3	3	3	3	3	3	12	12	12	12	12	12	12	12	12	12	12
87	35	83	55	45	70	80	75	85	86	75	70	3	2	1	1	2	2	1	2	2	2	12	6	2	3	8	6	4	8	6	6	6.1
88	44	0	0	0	0	0	0	0	0	0	0	0	0	0	0	0	0	0	0	0	0	0	0	0	0	0	0	0	0	0	0	0
89	24	18	25	27	4	4	7	20	33	12	40	2	2	2	2	2	2	2	1	2	2	2	2	4	0	0	2	2	2	2	4	2
90	32	95	99	99	98	99	100	100	100	95	98	3	3	3	2	2	2	3	3	3	3	12	12	12	8	8	8	12	12	12	12	10.8
91	53	100	99	99	98	95	98	98	95	95	97	3	3	3	3	3	3	3	3	3	3	12	12	12	12	12	12	12	12	12	12	12
92	36	97	98	100	98	95	92	98	99	95	94	3	3	3	3	3	3	3	3	3	3	12	12	12	12	12	12	12	12	12	12	12
93	44	99	100	100	98	95	92	98	99	95	94	3	3	3	3	3	3	3	3	3	3	12	12	12	12	12	12	12	12	12	12	12
94	54	0	0	0	0	0	0	0	0	0	0	0	0	0	0	0	0	0	0	0	0	0	0	0	0	0	0	0	0	0	0	0
95	26	0	0	0	0	0	0	0	0	0	0	0	0	0	0	0	0	0	0	0	0	0	0	0	0	0	0	0	0	0	0	0
96	41	0	0	0	0	0	0	0	0	0	0	0	0	0	0	0	0	0	0	0	0	0	0	0	0	0	0	0	0	0	0	0
97	30	72	95	92	85	97	96	88	82	90	89	2	2	2	2	3	3	3	2	2	3	6	8	8	8	12	12	12	8	8	12	9.4
98	32	0	0	0	0	0	0	0	0	0	0	0	0	0	0	0	0	0	0	0	0	0	0	0	0	0	0	0	0	0	0	0
99	27	80	85	99	85	98	92	79	89	91	91	3	3	3	3	3	3	3	3	3	3	12	12	12	12	12	12	12	12	12	12	12
100	51	95	97	96	94	100	98	96	95	96	92	3	3	3	3	3	3	3	3	3	3	12	12	12	12	12	12	12	12	12	12	12
101	40	0	0	0	0	0	0	0	0	0	0	0	0	0	0	0	0	0	0	0	0	0	0	0	0	0	0	0	0	0	0	0
102	40	41	65	33	7	25	17	7	19	22	8	2	1	1	1	1	1	1	1	1	1	4	3	2	1	1	1	1	1	1	1	1.6
103	42	0	0	0	0	0	0	0	0	0	0	0	0	0	0	0	0	0	0	0	0	0	0	0	0	0	0	0	0	0	0	0
104	53	0	0	0	0	0	0	0	0	0	0	0	0	0	0	0	0	0	0	0	0	0	0	0	0	0	0	0	0	0	0	0
105	46	100	95	100	90	98	95	95	90	92	98	3	3	2	2	2	2	2	3	2	2	12	12	8	8	8	8	8	12	8	8	9.2
106	28	0	0	0	0	0	0	0	0	0	0	0	0	0	0	0	0	0	0	0	0	0	0	0	0	0	0	0	0	0	0	0
107	40	0	0	0	0	0	0	0	0	0	0	0	0	0	0	0	0	0	0	0	0	0	0	0	0	0	0	0	0	0	0	0
108	56	0	0	0	0	0	0	0	0	0	0	0	0	0	0	0	0	0	0	0	0	0	0	0	0	0	0	0	0	0	0	0
109	46	60	72	91	85	97	85	90	94	88	89	3	2	3	3	3	2	3	3	3	3	9	6	12	12	12	8	12	12	12	12	10.7
110	36	20	15	0	0	17	25	0	0	25	22	1	1	0	0	1	1	0	0	1	1	1	1	0	0	1	1	0	0	1	1	0.6
111	27	0	0	0	0	0	0	0	0	0	0	0	0	0	0	0	0	0	0	0	0	0	0	0	0	0	0	0	0	0	0	0
112	24	0	0	0	0	0	0	0	0	0	0	0	0	0	0	0	0	0	0	0	0	0	0	0	0	0	0	0	0	0	0	0
113	46	0	0	0	0	0	0	0	0	0	0	0	0	0	0	0	0	0	0	0	0	0	0	0	0	0	0	0	0	0	0	0
114	33	45	30	50	10	6	25	11	5	44	37	2	2	2	2	2	2	1	1	2	2	4	4	4	2	2	2	1	1	4	4	2.8
115	44	0	0	0	0	0	0	0	0	0	0	0	0	0	0	0	0	0	0	0	0	0	0	0	0	0	0	0	0	0	0	0
116	43	4	35	0	0	0	7	0	0	15	0	1	1	0	0	0	1	0	0	1	0	0	2	0	0	0	1	0	0	1	0	0.4
117	42	0	0	0	0	0	0	0	0	0	0	0	0	0	0	0	0	0	0	0	0	0	0	0	0	0	0	0	0	0	0	0
118	64	82	85	80	85	85	80	75	78	89	75	2	2	2	2	2	3	3	2	2	2	8	8	8	8	8	12	9	8	8	6	8.3
119	45	0	0	0	0	0	0	0	0	0	0	0	0	0	0	0	0	0	0	0	0	0	0	0	0	0	0	0	0	0	0	0
120	50	0	0	0	0	0	0	0	0	0	0	0	0	0	0	0	0	0	0	0	0	0	0	0	0	0	0	0	0	0	0	0
121	34	95	98	91	90	99	95	95	96	98	99	3	3	3	3	3	3	3	3	3	3	12	12	12	12	12	12	12	12	12	12	12
122	45	97	94	99	100	95	99	97	97	98	99	2	2	2	2	3	2	3	2	2	2	8	8	8	8	12	8	12	8	8	8	8.8
123	41	0	0	0	0	0	0	0	0	0	0	0	0	0	0	0	0	0	0	0	0	0	0	0	0	0	0	0	0	0	0	0
124	36	0	0	0	0	0	0	0	0	0	0	0	0	0	0	0	0	0	0	0	0	0	0	0	0	0	0	0	0	0	0	0
125	49	100	100	95	98	95	98	99	97	96	96	2	2	2	2	3	2	2	2	2	2	8	8	8	8	12	8	8	8	8	8	8.4
126	41	20	0	0	35	25	25	30	30	0	32	1	0	0	1	1	1	1	1	0	1	1	0	0	2	1	1	2	2	0	2	1.1
127	46	90	75	85	95	92	90	95	95	88	85	2	2	2	2	1	2	1	2	2	2	8	6	8	8	4	8	4	8	8	8	7
128	48	90	88	78	80	95	97	88	82	81	77	2	2	2	2	2	1	2	2	2	2	8	8	8	8	8	4	8	8	8	8	7.6
129	45	0	0	0	0	0	0	0	0	0	0	0	0	0	0	0	0	0	0	0	0	0	0	0	0	0	0	0	0	0	0	0
130	35	90	75	100	75	95	95	90	80	90	95	2	2	3	3	3	3	3	2	3	3	8	6	12	9	12	12	12	8	12	12	10.3
131	35	82	91	100	95	95	90	90	95	89	90	3	3	2	2	2	2	3	2	2	3	12	12	8	8	8	8	12	8	8	12	9.6
132	47	75	90	95	92	95	97	87	90	95	99	3	3	3	3	2	2	3	3	2	3	9	12	12	12	8	8	12	12	8	12	10.5
133	52	0	0	0	0	0	0	0	0	0	0	0	0	0	0	0	0	0	0	0	0	0	0	0	0	0	0	0	0	0	0	0
134	36	60	100	100	75	80	90	85	81	100	99	3	2	3	2	2	3	2	2	3	2	9	8	12	6	8	12	8	8	12	8	9.1
135	44	95	70	65	71	72	75	64	66	75	68	1	1	2	2	2	2	2	1	1	2	4	3	6	6	6	6	6	3	3	6	4.9
136	40	70	80	60	60	70	66	75	62	65	70	3	3	3	3	3	3	3	3	3	3	9	12	9	9	9	9	9	9	9	9	9.3
137	38	0	0	0	0	0	0	0	0	0	0	0	0	0	0	0	0	0	0	0	0	0	0	0	0	0	0	0	0	0	0	0
138	40	90	80	92	85	92	90	85	90	90	82	2	2	1	1	1	2	2	1	1	2	8	8	4	4	4	8	8	4	4	8	6
139	64	0	0	0	0	0	0	0	0	0	0	0	0	0	0	0	0	0	0	0	0	0	0	0	0	0	0	0	0	0	0	0
140	46	0	0	0	0	0	0	0	0	0	0	0	0	0	0	0	0	0	0	0	0	0	0	0	0	0	0	0	0	0	0	0
141	45	22	15	7	41	3	4	5	10	11	5	1	1	1	1	1	1	1	3	2	1	1	1	1	2	0	0	1	1	1	1	0.9
142	53	95	93	90	98	90	90	95	99	90	90	3	3	3	3	2	3	3	3	2	3	12	12	12	12	8	12	12	12	8	12	11.2
143	28	70	90	100	95	95	99	98	95	98	98	3	2	2	2	3	3	2	2	2	2	9	8	8	8	12	12	8	8	8	8	8.9
144	30	72	90	98	85	92	90	98	95	85	80	3	3	3	3	3	3	3	3	3	3	9	12	12	12	12	12	12	12	12	12	11.7
145	42	0	0	0	0	0	0	0	0	0	0	0	0	0	0	0	0	0	0	0	0	0	0	0	0	0	0	0	0	0	0	0
146	45	0	0	0	0	0	0	0	0	0	0	0	0	0	0	0	0	0	0	0	0	0	0	0	0	0	0	0	0	0	0	0
147	48	95	96	98	75	96	95	96	99	95	95	3	3	3	2	3	2	3	3	3	2	12	12	12	6	12	8	12	12	12	8	10.6
148	60	95	98	99	95	98	95	96	99	98	98	2	3	3	2	3	3	3	2	2	3	8	12	12	8	12	12	12	8	8	12	10.4
149	48	7	45	70	65	60	40	50	52	55	60	1	1	1	1	1	1	1	1	1	1	1	2	3	3	3	2	3	3	3	3	2.6
150	51	30	15	20	17	10	0	0	5	7	25	1	1	1	1	1	0	0	1	1	1	2	1	1	1	1	0	0	2	1	1	1
151	42	90	80	85	92	98	95	87	80	92	83	1	2	2	2	3	3	2	2	1	2	4	8	8	8	12	12	8	8	4	8	8
152	52	0	0	0	0	0	0	0	0	0	0	0	0	0	0	0	0	0	0	0	0	0	0	0	0	0	0	0	0	0	0	0
153	39	88	92	61	40	50	20	30	85	82	50	3	3	2	1	1	1	1	3	3	1	12	12	6	2	2	1	2	12	12	2	6.3
154	46	3	60	50	95	97	0	77	92	90	65	2	3	3	3	2	0	3	2	2	3	0	9	6	12	8	0	12	8	8	9	7.2
155	38	0	0	0	0	0	0	0	0	0	0	0	0	0	0	0	0	0	0	0	0	0	0	0	0	0	0	0	0	0	0	0
156	48	95	99	95	92	98	94	91	90	97	96	3	3	2	2	2	2	3	3	2	2	12	12	8	8	8	8	12	12	8	8	9.6
157	44	80	90	85	88	85	87	98	95	80	81	3	2	2	3	2	2	2	2	3	3	12	8	8	12	8	8	8	8	12	12	9.6
158	30	0	0	0	0	0	0	0	0	0	0	0	0	0	0	0	0	0	0	0	0	0	0	0	0	0	0	0	0	0	0	0
159	55	15	27	33	25	17	8	27	23	15	19	2	2	2	2	2	1	2	2	2	2	2	4	4	2	2	1	4	2	2	2	2.5
160	59	55	45	60	62	65	48	55	62	57	62	2	3	2	2	3	2	2	2	3	2	6	6	6	6	9	4	6	6	9	6	6.4
161	35	90	82	90	82	95	81	90	94	87	88	1	2	1	2	2	1	2	2	2	1	4	8	4	8	8	4	8	8	8	4	6.4
162	42	7	12	0	0	5	0	0	0	0	0	1	1	0	0	1	0	0	0	0	0	1	1	0	0	5	0	0	0	0	0	0.7
163	39	0	0	0	0	0	0	0	0	0	0	0	0	0	0	0	0	0	0	0	0	0	0	0	0	0	0	0	0	0	0	0
164	47	0	0	0	0	0	0	0	0	0	0	0	0	0	0	0	0	0	0	0	0	0	0	0	0	0	0	0	0	0	0	0
165	32	80	72	88	85	90	75	79	83	94	92	2	2	2	2	2	2	2	2	2	2	8	6	8	8	8	6	8	8	8	8	7.6
166	42	0	0	0	0	0	0	0	0	0	0	0	0	0	0	0	0	0	0	0	0	0	0	0	0	0	0	0	0	0	0	0
167	27	90	80	97	7	0	0	77	0	0	0	3	3	3	3	0	0	3	0	0	0	12	12	12	3	0	0	12	0	0	0	5.1
168	54	0	0	0	0	0	0	0	0	0	0	0	0	0	0	0	0	0	0	0	0	0	0	0	0	0	0	0	0	0	0	0
169	51	0	0	0	0	0	0	0	0	0	0	0	0	0	0	0	0	0	0	0	0	0	0	0	0	0	0	0	0	0	0	0
170	47	0	0	0	0	0	0	0	0	0	0	0	0	0	0	0	0	0	0	0	0	0	0	0	0	0	0	0	0	0	0	0
171	37	47	0	1	3	0	0	21	17	0	5	2	0	1	2	0	0	2	1	0	2	4	0	0	0	0	0	2	1	0	0	0.7
172	35	0	35	0	0	0	17	0	25	0	0	0	2	0	0	0	2	0	1	0	0	0	4	0	0	0	2	0	1	0	0	0.7
173	45	80	83	55	35	20	27	75	81	25	31	2	2	2	2	2	2	2	2	2	2	8	8	6	4	2	4	6	8	2	4	5.2
174	43	100	97	95	92	81	92	88	89	85	91	2	2	3	3	3	3	3	2	2	3	8	8	12	12	12	12	12	8	8	12	10.4
175	34	2	15	70	30	45	40	37	65	55	7	1	2	2	2	3	3	2	2	2	1	2	2	6	4	6	6	4	6	6	1	4.3
176	42	95	100	96	98	96	97	96	95	99	100	3	3	3	3	3	3	3	3	3	3	12	12	12	12	12	12	12	12	12	12	12
177	44	0	0	0	0	0	0	0	0	0	0	0	0	0	0	0	0	0	0	0	0	0	0	0	0	0	0	0	0	0	0	0
178	46	0	0	0	0	0	0	0	0	0	0	0	0	0	0	0	0	0	0	0	0	0	0	0	0	0	0	0	0	0	0	0
179	50	0	0	0	0	0	0	0	0	0	0	0	0	0	0	0	0	0	0	0	0	0	0	0	0	0	0	0	0	0	0	0
180	51	0	0	0	0	0	0	0	0	0	0	0	0	0	0	0	0	0	0	0	0	0	0	0	0	0	0	0	0	0	0	0
181	37	0	0	0	0	0	0	0	0	0	0	0	0	0	0	0	0	0	0	0	0	0	0	0	0	0	0	0	0	0	0	0
182	35	0	0	0	0	0	0	0	0	0	0	0	0	0	0	0	0	0	0	0	0	0	0	0	0	0	0	0	0	0	0	0
183	48	0	0	0	0	0	0	0	0	0	0	0	0	0	0	0	0	0	0	0	0	0	0	0	0	0	0	0	0	0	0	0
184	34	0	0	0	0	0	0	0	0	0	0	0	0	0	0	0	0	0	0	0	0	0	0	0	0	0	0	0	0	0	0	0
185	48	81	5	85	25	1	0	7	6	0	1	2	2	3	3	1	0	1	2	0	1	8	0	12	3	0	0	1	2	0	0	2.6
186	47	91	75	85	80	99	78	82	90	95	81	3	2	3	3	3	2	2	3	3	3	12	6	12	12	12	8	8	12	12	12	10.6
187	33	60	42	3	5	3	7	6	27	50	21	3	3	3	2	1	1	2	3	3	2	9	6	0	2	0	1	2	6	6	2	3.4
188	58	30	0	0	80	0	17	0	0	7	0	2	0	0	3	0	1	0	0	2	0	4	0	0	12	0	1	0	0	2	0	1.9
189	37	80	95	96	98	99	90	91	85	86	87	2	1	1	2	2	1	1	2	1	2	8	4	4	8	8	4	4	8	4	8	6
190	49	90	70	0	40	35	55	80	35	30	15	3	3	0	3	3	3	3	3	3	3	12	9	0	6	6	9	12	6	6	3	6.9
191	49	0	0	0	0	0	0	0	0	0	0	0	0	0	0	0	0	0	0	0	0	0	0	0	0	0	0	0	0	0	0	0
192	44	95	92	95	96	99	95	92	99	100	98	3	3	3	3	3	3	3	3	3	3	12	12	12	12	12	12	12	12	12	12	12
193	38	0	0	0	0	0	0	0	0	0	0	0	0	0	0	0	0	0	0	0	0	0	0	0	0	0	0	0	0	0	0	0
194	50	95	70	71	89	95	96	100	95	92	90	3	3	3	3	3	3	3	3	3	3	12	9	9	12	12	12	12	12	12	12	11.4
195	23	50	67	42	80	90	75	98	70	65	95	2	2	2	2	2	2	2	2	2	3	4	6	4	8	8	6	8	6	6	12	6.8
196	38	95	96	100	95	100	100	95	95	97	99	3	3	3	3	3	3	3	3	3	3	12	12	12	12	12	12	12	12	12	12	12
197	46	0	0	0	0	0	0	0	0	0	0	0	0	0	0	0	0	0	0	0	0	0	0	0	0	0	0	0	0	0	0	0
198	34	50	0	0	0	0	20	0	0	0	0	1	0	0	0	0	1	0	0	0	0	2	0	0	0	0	1	0	0	0	0	0.3
199	57	0	0	0	0	0	0	0	0	0	0	0	0	0	0	0	0	0	0	0	0	0	0	0	0	0	0	0	0	0	0	0
200	33	95	90	94	96	95	96	95	97	96	93	3	3	3	3	3	3	3	3	3	3	12	12	12	12	12	12	12	12	12	12	12
201	38	50	45	27	39	45	67	55	70	37	29	3	3	3	3	3	3	3	3	3	3	6	6	6	6	6	9	9	9	6	6	6.9
202	50	85	90	95	95	87	100	100	87	88	95	3	3	3	3	3	3	3	3	3	3	12	12	12	12	12	12	12	12	12	12	12
203	36	0	0	0	0	0	0	0	0	0	0	0	0	0	0	0	0	0	0	0	0	0	0	0	0	0	0	0	0	0	0	0
204	40	65	82	73	88	87	42	77	85	70	68	3	3	3	3	3	3	3	3	3	3	9	12	9	12	12	6	12	12	9	9	10.2
205	53	85	96	96	98	90	82	87	92	88	84	3	3	3	3	3	3	3	3	3	3	12	12	12	12	12	12	12	12	12	12	12
206	51	85	75	0	12	0	7	0	0	5	12	2	3	0	2	0	2	0	0	2	2	8	9	0	2	0	2	0	0	0	2	2.3
207	42	0	0	0	0	0	0	0	0	0	0	0	0	0	0	0	0	0	0	0	0	0	0	0	0	0	0	0	0	0	0	0
208	40	2	0	0	7	0	0	0	5	0	0	1	0	0	1	0	0	0	1	0	0	0	0	0	1	0	0	0	0	0	0	0.1
209	28	90	95	70	100	99	95	94	90	99	99	2	2	2	3	3	3	3	2	3	3	8	8	8	12	12	12	12	8	12	12	10.4
210	41	88	95	96	80	75	99	96	95	90	95	2	3	3	2	2	3	3	3	2	2	8	12	12	8	6	12	12	12	8	8	9.8
211	38	0	0	0	0	0	0	0	0	0	0	0	0	0	0	0	0	0	0	0	0	0	0	0	0	0	0	0	0	0	0	0
212	32	0	0	0	0	0	0	0	0	0	0	0	0	0	0	0	0	0	0	0	0	0	0	0	0	0	0	0	0	0	0	0
213	37	70	95	99	96	90	85	92	96	97	98	3	3	3	3	3	3	3	3	3	3	9	12	12	12	12	12	12	12	12	12	11.7
214	51	0	0	0	0	0	0	0	0	0	0	0	0	0	0	0	0	0	0	0	0	0	0	0	0	0	0	0	0	0	0	0
215	47	45	67	95	0	0	7	0	60	55	0	2	2	2	0	0	2	0	2	2	0	4	6	8	0	0	2	0	6	6	0	3.2
216	54	0	0	0	0	0	0	0	0	0	0	0	0	0	0	0	0	0	0	0	0	0	0	0	0	0	0	0	0	0	0	0
217	61	0	0	0	0	0	0	0	0	0	0	0	0	0	0	0	0	0	0	0	0	0	0	0	0	0	0	0	0	0	0	0
218	38	80	77	90	95	99	98	95	80	82	98	3	3	3	3	3	2	3	3	3	2	12	12	12	12	12	8	12	12	12	8	11.2
219	34	0	0	0	0	0	0	0	0	0	0	0	0	0	0	0	0	0	0	0	0	0	0	0	0	0	0	0	0	0	0	0
220	49	0	0	0	0	0	0	0	0	0	0	0	0	0	0	0	0	0	0	0	0	0	0	0	0	0	0	0	0	0	0	0
221	49	100	98	97	99	100	95	98	95	97	99	3	3	3	3	3	3	3	3	3	3	12	12	12	12	12	12	12	12	12	12	12
222	66	0	0	0	0	0	0	0	0	0	0	0	0	0	0	0	0	0	0	0	0	0	0	0	0	0	0	0	0	0	0	0
223	44	7	0	0	5	0	0	0	0	0	0	1	0	0	2	0	0	0	0	0	0	1	0	0	0	0	0	0	0	0	0	0.1
224	21	0	0	0	0	0	0	0	0	0	0	0	0	0	0	0	0	0	0	0	0	0	0	0	0	0	0	0	0	0	0	0
225	43	98	95	95	85	96	100	96	98	95	94	3	3	3	3	3	3	3	3	3	3	12	12	12	12	12	12	12	12	12	12	12
226	40	95	94	72	100	73	60	45	37	90	82	3	3	3	3	3	3	3	3	3	3	12	12	9	12	9	9	6	6	12	12	9.9
227	64	98	100	96	98	100	95	96	100	96	98	3	3	3	3	3	3	3	3	3	3	12	12	12	12	12	12	12	12	12	12	12
228	39	0	0	0	0	0	0	0	0	0	0	0	0	0	0	0	0	0	0	0	0	0	0	0	0	0	0	0	0	0	0	0
229	63	99	98	97	98	95	94	98	98	97	95	3	3	2	3	3	3	2	3	2	3	12	12	8	12	12	12	8	12	8	12	10.8
230	34	95	97	98	100	100	95	97	98	97	95	3	3	3	3	2	2	3	3	3	2	12	12	12	12	8	8	12	12	12	8	10.8
231	47	75	87	91	96	79	65	68	95	92	70	3	3	3	3	3	3	3	3	3	3	9	12	12	12	12	9	9	12	12	9	10.8
232	51	97	90	91	92	88	85	90	92	87	93	3	3	3	3	3	3	3	3	3	3	12	12	12	12	12	12	12	12	12	12	12
233	51	0	0	0	0	0	0	0	0	0	0	0	0	0	0	0	0	0	0	0	0	0	0	0	0	0	0	0	0	0	0	0
234	46	0	0	0	0	0	0	0	0	0	0	0	0	0	0	0	0	0	0	0	0	0	0	0	0	0	0	0	0	0	0	0
235	32	85	87	90	80	70	65	80	90	92	40	3	3	2	3	2	2	3	3	3	2	12	12	8	12	6	6	12	12	12	4	9.6
236	52	97	98	96	96	98	90	91	98	95	96	3	3	3	3	3	3	3	2	3	3	12	12	12	12	12	12	12	8	12	12	11.6
237	32	95	98	98	99	98	100	95	99	99	98	2	2	3	3	3	3	3	3	3	3	8	8	12	12	12	12	12	12	12	12	11.2
238	50	0	0	0	0	0	0	0	0	0	0	0	0	0	0	0	0	0	0	0	0	0	0	0	0	0	0	0	0	0	0	0
239	43	99	96	98	96	98	98	95	96	99	99	3	3	3	3	3	2	3	3	3	3	12	12	12	12	12	8	12	12	12	12	11.6
240	65	99	98	100	100	99	99	99	94	96	98	3	3	3	3	3	3	3	3	3	3	12	12	12	12	12	12	12	12	12	12	12
241	54	0	0	0	0	0	0	0	0	0	0	0	0	0	0	0	0	0	0	0	0	0	0	0	0	0	0	0	0	0	0	0
242	42	0	0	0	0	0	0	0	0	0	0	0	0	0	0	0	0	0	0	0	0	0	0	0	0	0	0	0	0	0	0	0
243	41	7	0	0	12	0	0	15	0	0	37	1	0	0	1	0	0	1	0	0	1	1	0	0	1	0	0	1	0	0	2	0.5
244	67	90	95	100	77	85	95	100	95	99	98	2	2	3	3	3	2	2	2	2	2	8	8	12	12	12	8	8	8	8	8	9.2
245	53	11	0	7	5	9	0	0	12	0	2	2	0	2	2	2	0	0	2	0	2	2	0	2	0	2	0	0	2	0	0	0.8
246	51	90	90	95	60	70	95	98	85	90	85	2	2	2	2	2	2	2	2	2	2	8	8	8	6	6	8	8	8	8	8	7.6
247	42	98	95	99	95	99	98	99	100	100	95	3	3	3	3	3	3	3	3	3	3	12	12	12	12	12	12	12	12	12	12	12
248	40	75	99	80	70	65	90	95	80	90	99	3	3	3	3	3	3	3	3	3	3	9	12	12	9	9	12	12	12	12	12	11.1
249	50	80	99	0	0	0	30	0	0	0	50	2	2	0	0	0	2	0	0	0	2	8	8	0	0	0	4	0	0	0	4	2.4
250	72	0	0	0	0	0	0	0	0	0	0	0	0	0	0	0	0	0	0	0	0	0	0	0	0	0	0	0	0	0	0	0
251	39	98	70	85	87	99	95	89	90	80	90	3	3	2	2	3	3	2	2	3	2	12	9	8	8	12	12	8	8	12	8	9.7
252	45	12	3	4	1	0	0	7	11	0	5	2	2	2	2	0	0	2	2	0	2	2	0	0	0	0	0	2	2	0	0	0.6
253	26	0	0	0	0	0	0	0	0	0	0	0	0	0	0	0	0	0	0	0	0	0	0	0	0	0	0	0	0	0	0	0
254	47	5	4	35	30	3	7	37	23	5	1	2	2	2	2	2	2	2	2	2	2	0	0	4	4	0	2	4	2	2	0	1.8
255	31	42	19	8	52	77	62	40	27	12	45	3	3	3	3	3	3	3	3	3	3	6	3	3	9	9	6	6	6	3	6	5.7
256	41	100	100	99	90	100	95	99	97	88	90	2	2	2	3	3	3	2	2	2	3	8	8	8	12	12	12	8	8	8	12	9.6
257	46	90	99	100	98	95	90	94	91	98	100	3	3	3	3	3	3	3	3	3	3	12	12	12	12	12	12	12	12	12	12	12
258	35	98	100	90	92	85	90	95	85	80	95	3	3	3	3	3	3	3	3	3	3	12	12	12	12	12	12	12	12	12	12	12
259	29	47	39	50	92	33	35	57	80	12	27	3	2	3	3	3	3	2	3	3	3	6	4	6	12	6	6	6	12	3	6	6.7
260	43	100	70	50	21	95	97	80	50	20	15	3	3	3	3	3	3	3	3	3	3	12	9	6	3	12	12	12	6	3	3	7.8
261	36	80	85	74	89	99	85	95	95	96	99	3	3	3	3	3	3	3	3	3	3	12	12	9	12	12	12	12	12	12	12	11.7
262	50	31	80	95	47	59	90	35	45	80	81	3	2	2	2	2	2	3	3	2	3	6	8	8	4	6	8	6	6	8	12	7.2
263	49	95	96	90	97	97	95	80	90	88	91	3	3	3	3	3	3	3	3	3	3	12	12	12	12	12	12	12	12	12	12	12
264	52	95	98	99	99	90	95	94	100	100	95	3	3	3	3	3	3	3	3	3	3	12	12	12	12	12	12	12	12	12	12	12
265	51	95	99	98	100	96	97	96	98	98	98	3	3	3	3	3	3	3	3	3	3	12	12	12	12	12	12	12	12	12	12	12
266	34	99	85	94	98	97	96	99	96	98	98	3	3	3	3	3	3	3	3	3	3	12	12	12	12	12	12	12	12	12	12	12
267	48	0	0	2	0	7	0	0	11	0	21	0	0	1	0	2	0	0	2	0	2	0	0	0	0	2	0	0	2	0	2	0.6
268	31	90	95	0	0	70	0	80	0	0	65	1	1	0	0	1	0	1	0	0	1	4	4	0	0	3	0	4	0	0	3	1.8
269	48	0	0	0	0	0	0	0	0	0	0	0	0	0	0	0	0	0	0	0	0	0	0	0	0	0	0	0	0	0	0	0
270	41	99	95	100	95	94	100	95	90	91	92	3	3	3	3	3	3	3	3	3	3	12	12	12	12	12	12	12	12	12	12	12
271	55	97	96	75	95	91	96	97	79	88	95	3	3	3	3	3	3	3	3	3	3	12	12	9	12	12	12	12	12	12	12	11.7
272	38	95	92	90	95	91	96	92	90	91	92	3	3	3	3	3	3	3	3	3	3	12	12	12	12	12	12	12	12	12	12	12
273	43	12	0	0	29	58	0	40	30	2	0	2	0	0	2	1	0	1	1	1	0	2	0	0	4	3	0	2	2	0	0	1.3
274	47	0	0	7	0	0	0	0	0	0	0	0	0	2	0	0	0	0	0	0	0	0	0	14	0	0	0	0	0	0	0	1.4
275	42	0	15	50	0	17	0	4	12	0	10	2	0	0	2	1	0	1	1	1	0	0	0	0	0	1	0	0	1	0	0	0.2
276	49	0	0	2	0	0	1	0	6	0	0	0	0	2	0	0	2	0	2	0	0	0	0	0	0	0	0	0	2	0	0	0.2
277	27	28	22	24	6	27	34	12	8	37	49	2	2	2	2	2	2	2	2	2	2	4	2	2	2	4	4	2	2	4	4	3
278	44	90	55	70	90	57	95	90	76	85	97	2	2	2	1	2	1	1	2	2	2	8	6	6	4	6	4	4	8	8	8	6.2
279	30	96	92	80	90	96	95	97	75	90	92	3	3	3	3	3	3	3	3	3	3	12	12	12	12	12	12	12	9	12	12	11.7
280	30	97	96	82	99	99	99	97	95	92	97	3	3	3	3	3	3	3	3	3	3	12	12	12	12	12	12	12	12	12	12	12
281	54	88	85	92	99	96	85	90	92	96	98	3	3	3	3	3	3	3	3	3	3	12	12	12	12	12	12	12	12	12	12	12
282	54	0	0	0	0	0	0	0	0	0	0	0	0	0	0	0	0	0	0	0	0	0	0	0	0	0	0	0	0	0	0	0
283	41	97	98	90	91	92	85	90	95	98	99	3	3	3	3	3	3	3	3	3	3	12	12	12	12	12	12	12	12	12	12	12
284	54	90	91	96	95	97	88	91	95	92	92	3	3	3	3	3	3	3	3	3	3	12	12	12	12	12	12	12	12	12	12	12
285	41	7	0	0	2	4	1	0	0	1	1	1	0	0	1	1	1	0	0	1	1	1	0	0	0	0	0	0	0	0	0	0.1
286	36	57	90	95	78	90	91	95	96	90	85	3	3	3	3	2	3	3	3	3	3	9	12	12	12	8	12	12	12	12	12	11.3
287	40	100	97	98	97	98	100	91	96	98	100	3	3	3	3	3	3	3	3	3	3	12	12	12	12	12	12	12	12	12	12	12
288	40	35	0	17	0	0	0	0	1	4	0	3	0	2	0	0	0	0	1	1	0	6	0	2	0	0	0	0	0	0	0	0.8
289	38	98	97	90	100	95	100	95	96	91	97	3	3	3	3	3	3	3	3	3	3	12	12	12	12	12	12	12	12	12	12	12
290	45	0	0	0	0	0	0	0	0	0	0	0	0	0	0	0	0	0	0	0	0	0	0	0	0	0	0	0	0	0	0	0
291	38	90	87	95	97	98	100	95	96	91	97	3	3	3	3	3	3	3	3	3	3	12	12	12	12	12	12	12	12	12	12	12
292	54	80	85	90	77	81	90	90	95	88	86	2	2	2	2	2	2	2	2	2	2	8	8	8	8	8	8	8	8	8	8	8
293	25	15	8	0	0	0	0	7	0	2	0	2	2	0	0	0	0	2	0	1	0	2	2	0	0	0	0	2	0	0	0	0.6
294	62	0	0	0	0	0	0	0	0	0	0	0	0	0	0	0	0	0	0	0	0	0	0	0	0	0	0	0	0	0	0	0
295	42	0	0	0	0	0	0	0	0	0	0	0	0	0	0	0	0	0	0	0	0	0	0	0	0	0	0	0	0	0	0	0
296	43	0	0	0	0	0	0	0	0	0	0	0	0	0	0	0	0	0	0	0	0	0	0	0	0	0	0	0	0	0	0	0
297	38	81	80	75	52	46	52	55	60	42	72	2	2	3	2	2	2	2	1	2	3	8	8	9	6	4	6	6	3	4	9	6.3
298	32	0	0	0	0	0	0	0	0	0	0	0	0	0	0	0	0	0	0	0	0	0	0	0	0	0	0	0	0	0	0	0
299	33	0	0	7	0	0	17	0	21	0	0	0	0	2	0	0	2	0	2	0	0	0	0	2	0	0	2	0	2	0	0	0.6
300	43	0	0	0	0	0	0	0	0	0	0	0	0	0	0	0	0	0	0	0	0	0	0	0	0	0	0	0	0	0	0	0
301	42	0	0	0	0	0	0	0	0	0	0	0	0	0	0	0	0	0	0	0	0	0	0	0	0	0	0	0	0	0	0	0
302	49	0	7	0	0	5	9	0	0	0	0	0	2	0	0	2	2	0	0	0	0	0	2	0	0	2	2	0	0	0	0	0.6
303	53	0	0	0	0	0	0	0	0	0	0	0	0	0	0	0	0	0	0	0	0	0	0	0	0	0	0	0	0	0	0	0
304	31	0	0	0	0	0	0	0	0	0	0	0	0	0	0	0	0	0	0	0	0	0	0	0	0	0	0	0	0	0	0	0
305	35	99	100	90	91	95	100	92	93	95	100	3	3	3	3	3	3	2	3	3	3	12	12	12	12	12	12	8	12	12	12	11.6
306	55	0	0	1	0	0	2	0	5	4	0	0	0	1	0	0	1	0	1	1	0	0	0	0	0	0	0	0	0	0	0	0
307	34	0	0	0	0	0	0	0	0	0	0	0	0	0	0	0	0	0	0	0	0	0	0	0	0	0	0	0	0	0	0	0
308	46	77	81	90	82	69	70	90	75	92	88	3	3	3	3	3	3	3	3	2	2	12	12	12	12	9	9	12	9	8	8	10.3
309	43	97	95	96	90	97	100	96	95	96	96	3	3	3	3	3	3	3	3	3	3	12	12	12	12	12	12	12	12	12	12	12
310	44	45	65	20	71	61	82	90	70	30	40	2	2	2	2	2	3	3	2	2	2	4	6	2	6	6	12	12	6	4	4	6.2
311	46	50	90	100	100	97	60	98	81	78	82	3	3	3	3	3	3	3	3	3	3	6	12	12	12	12	9	12	12	12	12	11.1
312	51	0	0	0	0	0	0	0	0	0	0	0	0	0	0	0	0	0	0	0	0	0	0	0	0	0	0	0	0	0	0	0
313	50	0	0	0	0	0	0	0	0	0	0	0	0	0	0	0	0	0	0	0	0	0	0	0	0	0	0	0	0	0	0	0
314	36	80	70	85	51	70	27	50	70	30	27	2	2	2	2	3	3	2	2	2	2	8	6	8	6	9	6	4	6	4	4	6.1
315	51	72	66	50	78	56	80	95	97	81	65	2	2	2	2	2	2	2	2	2	2	6	6	4	8	6	8	8	8	8	6	6.8
316	38	50	40	38	15	70	39	55	60	40	32	2	1	2	2	2	2	1	2	2	2	4	2	4	2	6	6	3	6	4	4	4.1
317	37	95	97	98	92	90	91	88	95	95	96	2	2	2	2	3	2	2	2	2	2	8	8	8	8	12	8	8	8	8	8	8.4
318	69	60	75	45	25	77	90	88	70	75	77	2	2	1	2	2	2	2	1	2	2	6	6	2	2	8	8	8	3	6	8	5.7
319	52	100	98	97	100	98	99	100	96	97	100	2	2	2	2	2	3	2	2	2	2	8	8	8	8	8	12	8	8	8	8	8.4
320	48	50	82	85	52	65	60	45	82	75	75	1	2	2	2	2	2	2	2	2	1	2	8	8	6	6	6	4	8	6	3	5.7
321	64	0	0	0	0	0	0	0	0	0	0	0	0	0	0	0	0	0	0	0	0	0	0	0	0	0	0	0	0	0	0	0
322	66	100	97	95	96	91	80	86	96	85	92	3	2	2	2	3	2	2	2	2	2	12	8	8	8	12	8	8	8	8	8	8.8
323	51	10	4	3	0	0	4	0	0	2	0	2	1	2	0	0	2	0	0	1	0	2	0	0	0	0	0	0	0	0	0	0.2
324	43	0	0	0	0	0	0	0	0	0	0	0	0	0	0	0	0	0	0	0	0	0	0	0	0	0	0	0	0	0	0	0
325	42	95	90	97	92	95	97	97	98	85	92	3	2	3	2	3	3	2	2	2	3	12	8	12	8	12	12	8	8	8	12	10
326	50	90	97	98	88	80	95	86	95	91	85	2	3	1	1	1	1	1	2	2	1	8	12	4	4	4	4	4	8	8	4	6
327	33	95	90	97	92	95	97	97	98	85	92	3	2	3	2	3	3	2	2	2	3	12	8	12	8	12	12	8	8	8	12	10
328	21	0	0	0	0	0	0	0	0	0	0	0	0	0	0	0	0	0	0	0	0	0	0	0	0	0	0	0	0	0	0	0
329		100	95	95	100	98	95	92	95	92	95	3	3	3	3	3	3	3	3	3	3	12	12	12	12	12	12	12	12	12	12	12
330		0	0	0	0	0	0	0	0	0	0	0	0	0	0	0	0	0	0	0	0	0	0	0	0	0	0	0	0	0	0	0
331		0	0	0	0	0	0	0	0	0	0	0	0	0	0	0	0	0	0	0	0	0	0	0	0	0	0	0	0	0	0	0
332		65	80	75	77	80	72	75	64	65	60	3	3	3	3	3	3	3	3	3	3	9	12	9	12	12	9	9	9	9	9	9.9
333		90	90	95	92	95	95	90	94	96	95	3	3	3	3	3	3	3	3	3	3	12	12	12	12	12	12	12	12	12	12	12
334		95	97	96	98	90	95	92	90	95	98	3	3	3	3	3	3	3	3	3	3	12	12	12	12	12	12	12	12	12	12	12
335		0	0	0	0	0	0	0	0	0	0	0	0	0	0	0	0	0	0	0	0	0	0	0	0	0	0	0	0	0	0	0
336		0	0	0	0	0	0	0	0	0	0	0	0	0	0	0	0	0	0	0	0	0	0	0	0	0	0	0	0	0	0	0
337		60	77	90	85	95	90	95	95	80	95	3	3	3	3	3	3	3	3	3	3	9	12	12	12	12	12	12	12	12	12	11.7
338		0	0	0	0	0	0	0	0	0	0	0	0	0	0	0	0	0	0	0	0	0	0	0	0	0	0	0	0	0	0	0
339		80	85	77	60	55	65	70	77	78	88	2	2	2	2	2	2	2	2	2	2	8	8	8	6	6	6	6	8	8	8	7.2
340		99	97	95	97	95	0	0	0	0	0	3	3	3	2	3	0	0	0	0	0	12	12	12	8	12	0	0	0	0	0	5.6
341		90	90	65	95	85	98	90	90	85	90	3	3	3	3	3	3	3	3	3	3	12	12	9	12	12	12	12	12	12	12	11.7
342		0	0	0	0	0	0	0	0	0	0	0	0	0	0	0	0	0	0	0	0	0	0	0	0	0	0	0	0	0	0	0
343		0	0	0	0	0	0	0	0	0	0	0	0	0	0	0	0	0	0	0	0	0	0	0	0	0	0	0	0	0	0	0
344		0	0	0	0	0	0	0	0	0	0	0	0	0	0	0	0	0	0	0	0	0	0	0	0	0	0	0	0	0	0	0
345		95	96	99	92	95	95	95	92	90	90	3	3	3	3	3	3	3	3	3	3	12	12	12	12	12	12	12	12	12	12	12
346		47	50	42	27	33	52	51	57	48	49	3	3	3	3	3	3	3	3	3	3	6	6	6	6	6	9	9	9	6	6	6.9
347		95	95	97	98	85	95	90	90	88	85	3	3	3	3	3	3	3	3	3	3	12	12	12	12	12	12	12	12	12	12	12
348		95	94	100	99	95	97	96	98	95	95	3	3	3	3	3	3	3	3	3	3	12	12	12	12	12	12	12	12	12	12	12
349		100	98	95	97	98	95	98	95	95	96	3	3	3	3	3	3	3	3	3	3	12	12	12	12	12	12	12	12	12	12	12
350		95	0	0	90	0	0	0	0	0	0	3	0	0	3	0	0	0	0	0	0	12	0	0	12	0	0	0	0	0	0	2.4
351
352
353
354
355
356
357
358
359
360
361
362
363
364
365
366
367
368

## Sheet: Ki-67 immunostaining 
		Staining area（%）										Staining intensity (0-3)										Score
Patient number	Patient year	Field 1	Field 2	Field 3	Field 4	Field 5	Field 6	Field 7	Field 8	Field 9	Field 10	Field 1	Field 2	Field 3	Field 4	Field 5	Field 6	Field 7	Field 8	Field 9	Field 10	Field 1	Field 2	Field 3	Field 4	Field 5	Field 6	Field 7	Field 8	Field 9	Field 10	Avergae
1	52	55	60	71	77	65	50	45	44	47	49	3	2	2	3	2	3	3	2	2	3	9	6	6	12	6	6	6	4	4	6	6.5
2	60	58	60	92	95	85	81	75	70	68	69	3	3	2	2	3	3	3	3	3	3	9	9	8	8	12	12	9	9	9	9	9.4
3	44	5	7	7	6	4	4	5	5	11	9	2	2	1	1	2	2	2	2	2	2	0	2	1	1	0	0	2	2	2	2	1.2
4	31	10	9	7	7	8	5	6	7	8	11	2	2	2	2	2	2	2	2	2	2	2	2	2	2	2	2	2	2	2	2	2
5	48	21	17	9	9	10	22	15	13	8	9	2	2	1	1	2	2	2	2	2	2	2	2	1	1	2	2	2	2	2	2	1.8
6	28	4	11	9	15	14	12	17	8	5	6	2	2	2	2	2	2	2	2	2	2	0	2	2	2	2	2	2	2	2	2	1.8
7	54	74	80	85	88	72	75	65	68	90	58	3	3	3	3	3	3	3	3	3	3	9	12	12	12	9	9	9	9	12	9	10.2
8	48	44	75	72	52	50	58	60	68	70	50	3	3	3	3	3	3	3	3	3	3	6	9	9	9	6	9	9	9	9	6	8.1
9	54	58	58	60	54	35	70	68	65	65	57	2	2	3	3	3	3	3	3	3	3	6	6	9	9	6	9	9	9	9	9	8.1
10	49	5	4	4	7	11	13	14	17	14	17	2	2	2	2	2	2	2	2	2	2	2	0	0	2	2	2	2	2	2	2	1.6
11	38	17	10	19	14	14	10	15	11	17	14	2	2	3	3	3	2	2	2	2	3	2	2	3	3	3	2	2	2	2	3	2.4
12	43	95	90	85	87	95	91	90	77	68	90	3	3	3	3	3	3	3	3	3	3	12	12	12	12	12	12	12	12	9	12	11.7
13	36	17	9	6	7	4	4	1	7	4	12	2	2	2	2	2	2	1	2	2	2	2	2	2	2	0	0	0	2	0	2	1.2
14	35	70	83	75	60	46	74	51	61	61	72	2	2	2	2	2	2	2	2	2	2	6	8	6	6	4	6	6	6	6	6	6
15	31	90	94	84	88	90	78	95	97	92	91	3	3	3	3	3	3	3	3	3	3	12	12	12	12	12	12	12	12	12	12	12
16	37	52	62	68	50	65	60	55	70	47	53	3	3	3	3	3	3	3	3	3	3	9	9	9	6	9	9	9	9	6	9	8.4
17	54	70	35	52	40	60	55	51	57	47	46	3	3	3	3	3	3	3	3	3	3	9	6	9	6	9	9	9	9	6	6	7.8
18	53	70	65	35	48	57	66	78	82	55	61	3	3	3	3	3	3	3	3	3	3	9	9	6	6	9	9	12	12	9	9	9
19	54	29	27	11	13	8	22	28	29	25	20	2	2	2	2	2	2	2	2	2	2	4	4	2	2	2	2	4	4	2	2	2.8
20	46	44	47	38	26	38	55	19	52	45	37	2	2	2	2	2	2	2	2	2	2	4	4	4	4	4	6	2	6	4	4	4.2
21	41	65	70	71	78	79	60	50	51	80	3	3	3	3	3	3	3	3	3	3	3	9	9	9	12	12	9	6	9	12	0	8.7
22	60	70	65	71	77	55	77	78	62	50	65	3	3	3	3	3	3	3	3	3	3	9	9	9	12	9	12	12	9	6	9	9.6
23	32	32	29	27	28	46	42	55	35	40	21	2	2	2	3	3	3	3	2	2	2	4	4	4	6	6	6	9	4	4	2	4.9
24	29	85	70	76	84	89	80	78	98	86	78	3	3	3	3	3	3	3	3	3	3	12	9	12	12	12	12	12	12	12	12	11.7
25	42	68	47	52	62	63	50	47	32	30	72	2	3	3	3	3	3	2	2	3	3	6	6	9	9	9	6	4	4	6	9	6.8
26	64	15	7	9	10	6	4	4	3	3	9	2	2	2	2	2	2	2	2	2	2	2	2	2	2	2	0	0	0	0	2	1.2
27	43	35	40	37	29	45	51	47	42	35	38	3	3	3	3	3	3	3	3	3	3	6	6	6	6	6	9	6	6	6	6	6.3
28	44	33	28	37	25	22	27	35	22	17	19	3	3	3	3	3	3	3	3	3	3	6	6	6	3	3	6	6	3	3	3	4.5
29	37	7	9	6	6	5	4	5	6	5	7	3	3	3	3	3	3	3	3	3	3	3	3	3	3	3	0	3	3	3	3	2.7
30	42	7	0	0	6	4	4	3	0	2	2	2	0	0	2	2	2	2	0	2	2	2	0	0	2	0	0	0	0	0	0	0.4
31	38	0	0	0	0	0	0	0	0	0	0	0	0	0	0	0	0	0	0	0	0	0	0	0	0	0	0	0	0	0	0	0
32	43	60	55	40	37	51	50	42	40	52	35	2	2	2	2	2	2	2	2	2	2	6	6	4	4	6	4	4	4	6	4	4.8
33	44	50	66	77	90	51	53	54	52	42	58	3	3	3	3	3	3	3	3	3	3	6	9	12	12	9	9	9	9	6	9	9
34	52	79	80	85	80	77	72	83	78	87	82	3	3	3	3	3	3	3	3	3	3	12	12	12	12	12	9	12	12	12	12	11.7
35	44	40	37	30	31	27	32	29	34	30	27	3	3	3	2	2	3	2	2	3	3	6	6	6	4	4	6	4	4	6	6	5.2
36	60	11	17	12	7	17	14	15	15	9	11	3	3	3	3	3	3	3	3	3	3	3	3	3	3	3	3	3	3	3	3	3
37	47	45	37	26	29	42	17	24	29	37	40	3	3	3	3	3	3	3	3	3	3	6	6	6	6	6	3	6	6	6	6	5.7
38	47	7	10	6	5	7	7	6	9	7	8	2	3	2	2	2	2	2	2	3	2	2	3	2	2	2	2	2	2	3	2	2.2
39	46	85	94	96	95	85	65	90	94	91	92	3	3	3	3	3	3	3	3	3	3	12	12	12	12	12	9	12	12	12	12	11.7
40	36	67	65	60	70	40	55	45	42	50	47	3	3	3	3	3	3	3	3	3	3	9	9	9	9	6	9	6	6	6	6	7.5
41	53	50	44	27	21	29	35	30	40	40	33	2	2	2	2	2	2	2	2	2	2	4	4	4	2	4	4	4	4	4	4	3.8
42	52	22	17	25	26	14	12	17	16	25	20	3	3	3	3	3	3	3	3	3	3	3	3	3	6	3	3	3	3	3	3	3.3
43	42	11	19	10	21	22	15	10	14	15	17	2	2	2	2	2	2	2	2	2	2	2	2	2	2	2	2	2	2	2	2	2
44	39	7	6	9	11	7	6	8	9	5	6	2	2	2	2	2	2	2	2	2	2	2	2	2	2	2	2	2	2	2	2	2
45	48	29	45	51	46	40	35	22	2	35	41	2	2	2	2	2	2	2	2	2	2	4	4	6	4	4	4	4	0	4	4	3.8
46	46	45	49	35	54	30	31	25	45	50	57	2	2	2	2	2	2	2	2	2	2	4	4	4	6	4	4	4	4	4	6	4.4
47	23	11	19	10	9	17	19	15	8	7	6	2	3	3	3	2	2	2	2	3	2	2	3	3	3	2	2	2	2	3	2	2.4
48	47	88	72	55	90	92	77	74	64	52	90	3	3	3	3	3	3	3	3	3	3	12	12	9	12	12	12	9	9	9	12	10.8
49	31	50	40	35	44	44	45	62	39	38	42	2	2	2	2	2	2	2	2	2	2	4	4	4	4	4	4	6	4	4	4	4.2
50	49	29	27	21	37	33	25	34	31	26	30	3	3	3	3	3	3	3	3	3	3	6	6	3	6	6	3	6	6	6	6	5.4
51	47	53	40	85	80	70	81	82	60	74	60	3	3	3	3	3	3	3	3	3	3	9	6	12	12	9	12	12	9	9	9	9.9
52	37	7	5	4	8	6	6	4	3	4	6	2	2	2	2	2	2	2	2	2	2	2	2	0	2	2	2	0	0	0	2	1.2
53	54	82	70	75	79	90	88	81	71	74	80	3	3	3	3	3	3	3	3	3	3	12	9	9	12	12	12	12	9	9	12	10.8
54	39	11	17	10	21	24	19	1	14	20	21	2	2	2	2	2	2	2	2	2	2	2	2	2	2	2	2	0	2	2	2	1.8
55	56	0	0	0	0	0	0	0	0	0	0	0	0	0	0	0	0	0	0	0	0	0	0	0	0	0	0	0	0	0	0	0
56	47	47	56	51	55	44	59	48	41	36	55	3	3	3	3	3	2	2	3	3	3	6	9	9	9	6	6	4	6	6	9	7
57	56	21	17	15	22	24	19	14	15	13	19	3	3	3	3	3	3	3	3	3	3	3	3	3	3	3	3	3	3	3	3	3
58	63	55	60	72	65	57	51	65	51	42	48	3	3	3	3	3	3	3	3	3	3	9	9	9	9	9	9	9	9	6	6	8.4
59	40	10	11	14	9	8	15	14	15	10	12	3	3	3	3	3	3	3	3	3	3	3	3	3	3	3	3	3	3	3	3	3
60	44	2	4	3	3	9	8	4	4	7	5	2	2	2	2	2	2	2	2	2	2	0	0	0	0	2	2	0	0	2	2	0.8
61	42	85	77	80	80	60	74	79	90	94	80	3	3	3	3	3	3	3	3	3	3	12	12	12	12	9	9	12	12	12	12	11.4
62	40	55	70	52	54	50	45	49	63	65	58	3	3	3	3	3	3	3	3	3	3	9	9	9	9	6	6	6	9	9	9	8.1
63	31	15	19	21	9	10	17	23	26	21	11	2	2	2	2	2	2	2	2	2	2	2	2	2	2	2	2	2	4	2	2	2.2
64	66	0	0	2	0	4	0	0	5	0	6	0	0	3	0	3	0	0	2	0	2	0	0	0	0	0	0	0	2	0	2	0.4
65	41	70	81	90	66	75	78	82	91	85	77	3	3	3	3	3	3	3	3	3	3	9	12	12	9	9	12	12	12	12	9	10.8
66	33	40	45	68	50	35	29	47	57	54	50	3	3	3	3	3	3	3	3	3	3	6	6	9	6	6	6	6	9	9	6	6.9
67	41	55	60	50	50	57	42	35	6	55	29	3	3	3	3	3	3	3	3	3	3	9	9	6	6	9	6	6	3	9	6	6.9
68	30	51	42	44	66	70	74	70	60	68	66	2	2	2	2	2	2	2	2	2	2	6	4	4	6	6	6	6	6	6	6	5.6
69	53	17	11	9	15	4	7	11	10	6	5	2	2	2	2	2	2	2	2	2	2	2	2	2	2	0	2	2	2	2	2	1.8
70	46	15	21	10	22	24	19	14	13	11	15	2	2	2	2	2	2	2	2	2	2	2	2	2	2	2	2	2	2	2	2	2
71	61	50	57	40	47	55	61	42	50	37	33	3	3	3	3	3	3	3	3	3	3	6	9	6	6	9	9	6	6	6	6	6.9
72	53	11	7	4	14	10	8	7	5	11	9	2	2	2	2	2	2	2	2	2	2	2	2	0	2	2	2	2	2	2	2	1.8
73	35	7	1	2	8	7	5	6	7	6	5	2	3	3	2	2	2	2	2	2	2	2	0	0	2	2	2	2	2	2	2	1.6
74	51	2	0	7	4	3	2	2	0	1	2	2	0	2	2	2	2	2	0	2	2	0	0	2	0	0	0	0	0	0	0	0.2
75	28	7	6	1	2	1	1	6	9	1	2	2	2	2	2	2	2	2	2	2	2	2	2	0	0	0	0	2	2	0	0	0.8
76	36	40	79	90	50	37	82	80	90	76	65	3	3	3	3	3	3	3	3	3	3	6	12	12	6	6	12	12	12	12	9	9.9
77	43	51	42	31	35	45	57	42	35	33	32	3	3	3	3	3	3	3	3	3	3	9	6	6	6	6	9	6	6	6	6	6.6
78	52	35	31	25	40	11	10	25	24	19	9	2	2	2	2	2	2	2	2	2	2	4	4	2	4	2	2	2	2	2	2	2.6
79	39	60	81	55	46	57	58	79	82	67	77	3	3	2	2	2	3	3	3	3	3	9	12	6	4	6	9	12	12	9	12	9.1
80	50	31	20	14	33	28	15	14	17	19	15	3	3	3	3	3	3	3	3	3	3	6	3	3	6	6	3	3	3	3	3	3.9
81	45	70	65	65	58	72	77	65	60	55	54	3	3	3	3	3	3	3	3	3	3	9	9	9	9	9	12	9	9	9	9	9.3
82	47	77	78	84	89	51	59	61	70	77	90	2	2	2	2	2	2	2	2	2	2	8	8	8	8	6	6	6	6	8	8	7.2
83	43	10	30	19	26	11	10	10	14	12	9	2	2	2	2	2	2	2	2	2	2	2	4	2	4	2	2	2	2	2	2	2.4
84	40	0	0	0	0	0	0	0	0	0	0	0	0	0	0	0	0	0	0	0	0	0	0	0	0	0	0	0	0	0	0	0
85	21	21	17	11	37	35	30	27	19	39	25	2	2	2	2	2	2	2	2	2	2	2	2	2	4	4	4	4	2	4	2	3
86	53	80	75	89	85	77	74	90	86	79	81	3	3	3	3	3	3	3	3	3	3	12	9	12	12	12	9	12	12	12	12	11.4
87	35	11	7	9	9	12	10	8	11	13	7	3	3	3	2	3	3	3	3	3	2	3	3	3	2	3	3	3	3	3	2	2.8
88	44	11	9	10	8	7	6	11	10	8	8	2	2	2	2	2	2	2	2	2	2	2	2	2	2	2	2	2	2	2	2	2
89	24	15	20	27	11	13	9	17	16	18	10	2	2	2	2	2	2	2	2	2	2	2	2	4	2	2	2	2	2	2	2	2.2
90	32	70	65	84	87	75	71	85	60	70	82	2	2	2	2	2	2	2	2	2	2	6	6	8	8	6	6	8	6	6	8	6.8
91	53	27	19	35	37	27	20	19	37	40	29	3	3	3	3	3	3	3	3	3	3	6	3	6	6	6	3	3	6	6	6	5.1
92	36	61	63	55	54	70	42	35	95	90	50	2	2	2	3	2	3	3	3	3	3	6	6	6	9	6	6	6	12	12	6	7.5
93	44	55	67	42	62	55	70	65	62	51	47	3	3	3	3	2	3	3	3	3	3	9	9	6	9	6	9	9	9	9	6	8.1
94	54	10	7	11	14	15	16	11	10	9	12	3	3	3	3	3	3	3	3	3	3	3	3	3	3	3	3	3	3	3	3	3
95	26	0	0	2	0	3	0	0	2	2	2	0	0	2	0	2	0	0	2	2	2	0	0	0	0	0	0	0	0	0	0	0
96	41	10	9	9	11	6	14	15	12	12	10	2	2	2	2	2	2	2	2	2	2	2	2	2	2	2	2	2	2	2	2	2
97	30	77	65	54	51	60	45	68	62	74	79	2	2	2	2	2	2	2	2	2	2	8	6	6	6	6	4	6	6	6	2	5.6
98	32	17	15	11	14	20	14	13	17	9	10	2	2	2	2	2	2	2	2	2	2	2	2	2	2	2	2	2	2	2	2	2
99	27	43	84	70	69	74	81	65	49	55	82	3	3	3	3	3	3	3	3	3	3	6	12	9	9	9	12	9	6	9	12	9.3
100	51	60	70	55	49	72	63	65	60	61	58	3	3	3	3	3	3	3	3	3	3	9	9	9	6	9	9	9	9	9	9	8.7
101	40	10	7	10	13	12	17	10	15	17	10	3	2	3	3	2	2	3	3	2	2	3	2	3	3	2	2	3	3	2	2	2.5
102	40	11	9	7	15	19	11	9	8	11	13	2	2	2	2	2	2	2	2	2	2	2	2	2	2	2	2	2	2	2	2	2
103	42	45	61	70	42	55	75	71	72	77	61	2	2	2	2	2	2	2	2	2	2	4	6	6	4	6	6	6	6	8	6	5.8
104	53	10	14	17	19	10	10	9	14	15	18	3	3	3	2	2	2	2	2	2	2	3	3	3	2	2	2	2	2	2	2	2.3
105	46	45	61	70	42	55	75	71	82	79	61	2	3	3	3	2	2	2	3	3	3	4	9	9	6	6	6	6	12	12	9	7.9
106	28	7	4	4	5	2	4	7	8	7	6	2	2	2	2	2	2	2	2	2	2	2	0	0	2	0	0	2	2	2	2	1.2
107	40	0	0	0	0	0	0	0	0	0	0	0	0	0	0	0	0	0	0	0	0	0	0	0	0	0	0	0	0	0	0	0
108	56	7	1	1	2	3	0	7	5	1	3	2	2	2	2	2	0	2	2	2	2	2	0	0	0	0	0	2	2	0	0	0.6
109	46	30	45	70	58	80	88	85	78	80	72	1	1	1	1	1	1	1	1	1	1	2	2	3	3	4	4	4	4	4	3	3.3
110	36	1	0	0	0	2	0	0	0	7	0	1	0	0	0	1	0	0	0	1	0	0	0	0	0	0	0	0	0	1	0	0.1
111	27	3	7	9	5	5	4	2	7	7	4	2	2	2	2	2	2	2	2	2	2	0	2	2	2	2	0	0	2	2	0	1.2
112	24	0	0	0	0	0	0	0	0	0	0	0	0	0	0	0	0	0	0	0	0	0	0	0	0	0	0	0	0	0	0	0
113	46	7	9	0	0	1	2	0	0	3	5	1	1	0	0	1	1	0	0	1	1	1	1	0	0	0	0	0	0	0	1	0.3
114	33	25	14	11	15	10	9	8	7	11	10	2	2	2	2	2	2	2	2	2	2	2	2	2	2	2	2	2	2	2	2	2
115	44	8	7	5	6	10	9	11	12	13	10	3	3	3	3	3	3	3	2	2	3	3	3	3	3	3	3	3	2	2	3	2.8
116	43	1	2	0	0	5	4	1	0	0	1	3	3	0	0	3	3	3	0	0	2	0	0	0	0	3	0	3	0	0	0	0.6
117	42	4	1	1	0	5	4	7	1	1	1	2	2	2	0	2	2	2	2	2	2	0	0	0	0	2	0	2	0	0	0	0.4
118	64	7	0	9	10	13	9	5	4	7	9	2	0	2	2	2	2	2	2	2	2	2	0	2	2	2	2	2	0	2	2	1.6
119	45	7	9	5	4	3	1	1	7	6	4	3	2	2	2	2	2	2	2	2	2	3	2	2	0	0	0	0	2	2	0	1.1
120	50	0	0	0	0	0	0	0	0	0	0	0	0	0	0	0	0	0	0	0	0	0	0	0	0	0	0	0	0	0	0	0
121	34	31	19	22	17	30	27	25	20	14	11	2	2	2	2	2	2	2	2	2	2	4	2	2	2	4	4	2	2	2	2	2.6
122	45	11	10	9	7	31	27	17	12	19	20	2	1	1	2	1	1	1	1	1	1	2	1	1	2	1	2	1	1	1	1	1.3
123	41	2	1	4	1	3	5	6	1	1	1	2	2	2	2	2	2	2	2	2	2	0	0	0	0	0	2	2	0	0	0	0.4
124	36	11	7	0	2	19	0	0	0	0	8	1	2	0	0	2	0	0	0	0	2	1	2	0	0	2	0	0	0	0	1	0.6
125	49	80	79	78	91	77	81	83	85	91	89	2	2	2	2	2	2	2	2	2	2	8	8	8	8	8	8	8	8	8	8	8
126	41	19	17	27	6	11	20	18	11	9	10	2	2	2	2	2	2	2	2	2	2	2	2	4	2	2	2	2	2	2	2	2.2
127	46	35	20	15	17	22	30	12	17	18	29	3	3	3	3	3	3	3	3	3	3	6	3	3	3	3	6	3	3	3	6	3.9
128	48	60	45	57	51	42	47	44	49	57	52	3	3	3	3	3	3	3	3	3	3	9	6	9	9	6	6	6	6	9	9	7.5
129	45	17	19	11	18	17	22	10	17	14	13	2	2	2	2	2	2	2	2	2	2	2	2	2	2	2	2	2	2	2	2	2
130	35	70	65	77	85	80	72	55	50	78	89	2	2	2	2	2	2	2	2	2	2	6	6	8	8	8	6	6	4	8	8	6.8
131	35	77	78	90	80	68	75	70	79	77	74	3	3	3	3	3	3	3	3	3	3	12	12	12	12	9	9	9	12	12	9	10.8
132	47	65	51	49	65	68	74	71	70	54	55	3	3	3	2	2	2	2	3	3	3	9	9	6	6	6	6	6	9	9	9	7.5
133	52	25	21	17	29	15	14	15	12	30	27	3	3	3	3	3	3	3	3	3	3	3	3	3	6	3	3	3	3	6	6	3.9
134	36	31	25	22	19	17	35	32	26	40	45	2	2	2	2	2	2	2	2	2	2	4	2	2	2	2	4	4	4	4	4	3.2
135	44	51	27	31	40	27	28	38	35	44	52	2	2	2	2	2	2	2	2	2	2	6	4	4	4	4	4	4	4	4	6	4.4
136	40	70	81	75	80	60	70	67	58	40	40	3	3	3	3	3	3	3	3	3	3	9	12	9	12	9	9	9	9	6	6	9
137	38	21	12	17	15	14	11	10	9	14	14	3	3	3	3	3	3	3	3	3	3	3	3	3	3	3	3	3	3	3	3	3
138	40	75	79	82	70	65	80	72	65	66	85	3	3	3	3	3	3	3	3	3	3	9	12	12	9	9	12	9	9	9	12	10.2
139	64	15	17	12	10	8	11	5	4	7	6	2	2	2	2	2	2	2	2	2	2	2	2	2	2	2	2	2	0	2	2	1.8
140	46	0	0	1	0	0	0	1	0	1	0	0	0	3	0	0	0	2	0	3	0	0	0	0	0	0	0	0	0	0	0	0
141	45	27	25	21	9	11	15	12	19	20	13	2	2	2	2	2	2	2	2	2	2	4	2	2	2	2	2	2	2	2	2	2.2
142	53	30	22	27	31	37	45	57	51	42	21	3	3	3	3	3	2	2	3	3	3	6	3	6	6	6	4	6	9	6	3	5.5
143	28	15	17	10	25	21	24	11	13	17	10	2	2	2	2	2	2	2	2	2	2	2	2	2	2	2	2	2	2	2	2	2
144	30	55	51	42	35	37	29	39	25	21	35	3	2	2	3	3	3	3	3	3	3	9	6	4	6	6	6	6	3	3	6	5.5
145	42	19	11	17	9	10	15	15	13	9	8	2	2	2	2	2	2	2	2	2	2	2	2	2	2	2	2	2	2	2	2	2
146	45	17	21	23	15	25	21	15	17	19	21	3	2	3	3	2	3	2	2	2	2	3	2	3	3	2	3	2	2	2	2	2.4
147	48	85	90	75	77	65	55	69	47	52	59	3	3	2	2	3	3	3	3	3	3	12	12	6	8	9	9	9	6	9	9	8.9
148	60	92	95	90	85	92	91	77	89	82	90	3	3	3	3	3	3	3	3	3	3	12	12	12	12	12	12	12	12	12	12	12
149	48	31	25	22	21	27	19	23	21	25	20	3	3	2	3	3	3	3	3	3	3	6	3	2	3	6	3	3	3	3	3	3.5
150	51	11	12	10	9	13	11	12	13	11	9	3	3	3	3	3	3	3	3	3	3	3	3	3	3	3	3	3	3	3	3	3
151	42	52	60	40	45	57	35	40	56	52	55	3	3	3	3	3	3	3	3	3	3	9	9	6	6	9	6	6	9	9	9	7.8
152	52	0	0	0	0	0	0	0	0	0	0	0	0	0	0	0	0	0	0	0	0	0	0	0	0	0	0	0	0	0	0	0
153	39	0	0	4	0	0	0	0	7	0	0	0	0	2	0	0	0	0	2	0	0	0	0	0	0	0	0	0	2	0	0	0.2
154	46	11	7	6	9	5	4	9	8	7	9	3	3	3	3	3	3	3	3	3	3	3	3	3	3	3	0	3	3	3	3	2.7
155	38	1	0	0	0	0	1	0	0	0	0	2	0	0	0	0	2	0	0	0	0	0	0	0	0	0	0	0	0	0	0	0
156	48	85	90	82	88	81	85	91	95	74	82	2	2	2	2	2	2	2	2	2	2	8	8	8	8	8	8	8	8	6	8	7.8
157	44	75	51	62	52	50	45	77	60	50	75	2	2	2	2	2	2	2	2	2	2	6	6	6	6	4	4	8	6	4	6	5.6
158	30	11	7	7	5	9	9	9	12	8	9	2	2	2	2	2	2	2	2	2	2	2	2	2	2	2	2	2	2	2	2	2
159	55	0	0	0	0	0	0	0	0	0	0	0	0	0	0	0	0	0	0	0	0	0	0	0	0	0	0	0	0	0	0	0
160	59	45	21	35	45	37	48	51	40	32	27	3	3	3	3	3	3	3	3	3	3	6	3	6	6	6	6	9	6	6	6	6
161	35	30	35	29	47	41	45	42	40	44	45	3	3	3	3	3	3	3	3	3	3	6	6	6	6	6	6	6	6	6	6	6
162	42	0	0	0	0	0	0	0	0	0	0	0	0	0	0	0	0	0	0	0	0	0	0	0	0	0	0	0	0	0	0	0
163	39	14	20	23	27	26	29	27	24	23	27	3	3	3	3	3	3	3	3	3	3	42	3	3	6	6	6	6	3	3	6	8.4
164	47	0	0	0	0	0	0	0	0	0	0	0	0	0	0	0	0	0	0	0	0	0	0	0	0	0	0	0	0	0	0	0
165	32	95	90	88	87	84	85	90	95	92	87	3	3	3	3	3	3	3	3	3	3	12	12	12	12	12	12	12	12	12	12	12
166	42	9	0	0	0	11	3	2	1	12	0	2	0	0	0	2	2	2	2	2	0	2	0	0	0	2	0	0	0	2	0	0.6
167	27	31	37	44	29	25	24	42	47	51	33	0	0	0	0	0	0	0	0	0	0	0	0	0	0	0	0	0	0	0	0	0
168	54	7	9	8	4	4	9	6	7	5	7	2	2	2	2	2	2	2	2	2	2	2	2	2	0	0	2	2	2	2	2	1.6
169	51	11	9	7	14	5	6	8	13	10	8	2	2	2	2	2	2	2	2	2	2	2	2	2	2	2	2	2	2	2	2	2
170	47	11	7	5	3	7	9	11	7	8	3	2	2	2	2	2	2	1	1	2	1	2	2	2	0	2	2	1	1	2	0	1.4
171	37	9	7	1	5	6	3	3	2	4	2	2	2	2	2	2	2	2	2	2	2	2	2	0	2	2	0	0	0	0	0	0.8
172	35	21	17	27	29	11	15	15	14	17	19	2	2	2	2	2	2	2	2	2	2	2	2	4	4	2	2	2	2	2	2	2.4
173	45	15	7	20	15	17	9	10	5	22	11	2	2	2	2	2	2	2	2	2	2	2	2	2	2	2	2	2	2	2	2	2
174	43	65	77	80	60	84	90	57	60	66	79	3	3	3	3	3	3	3	3	3	3	9	12	12	9	12	12	9	9	9	12	10.5
175	34	15	17	11	19	27	20	25	19	29	20	2	2	2	2	2	2	2	2	2	2	2	2	2	2	4	2	2	2	4	2	2.4
176	42	35	50	55	40	30	37	56	46	41	42	2	2	2	2	2	2	2	2	2	2	4	4	6	4	4	4	6	4	4	4	4.4
177	44	1	0	0	0	3	0	0	5	0	0	2	0	0	0	2	0	0	1	0	0	0	0	0	0	0	0	0	1	0	0	0.1
178	46	9	7	7	6	5	9	8	7	8	7	3	3	3	3	3	3	3	3	3	3	3	3	3	3	3	3	3	3	3	3	3
179	50	4	5	0	0	7	6	4	3	2	3	2	2	0	0	2	2	2	2	2	2	0	0	0	0	2	2	0	0	0	0	0.4
180	51	0	0	0	0	0	0	0	0	0	0	0	0	0	0	0	0	0	0	0	0	0	0	0	0	0	0	0	0	0	0	0
181	37	0	1	0	2	2	1	1	1	1	1	0	1	0	1	1	1	1	1	1	1	0	0	0	0	0	0	0	0	0	0	0
182	35	0	0	0	0	0	0	0	0	0	0	0	0	0	0	0	0	0	0	0	0	0	0	0	0	0	0	0	0	0	0	0
183	48	0	0	0	0	0	0	0	0	0	0	0	0	0	0	0	0	0	0	0	0	0	0	0	0	0	0	0	0	0	0	0
184	34	0	0	0	0	0	0	0	0	0	0	0	0	0	0	0	0	0	0	0	0	0	0	0	0	0	0	0	0	0	0	0
185	48	20	19	27	25	24	15	33	37	19	24	1	1	1	1	1	1	2	2	1	2	1	1	2	1	1	1	4	4	1	2	1.8
186	47	21	17	40	42	25	57	40	30	2	51	3	3	2	2	3	3	2	3	2	2	3	3	4	4	3	9	4	6	0	6	4.2
187	33	3	7	5	5	6	5	3	7	17	6	2	2	2	2	2	2	2	2	2	2	0	2	2	2	2	2	0	2	2	2	1.6
188	58	11	7	10	7	20	5	11	14	13	15	2	2	2	2	2	2	2	2	2	2	2	2	2	2	2	2	2	2	2	2	2
189	37	52	77	65	78	70	85	60	52	45	58	3	3	3	3	3	3	3	3	3	3	9	12	9	12	9	12	9	9	6	9	9.6
190	49	7	15	8	15	16	7	6	5	8	2	2	2	2	2	2	2	2	2	2	2	2	2	2	2	2	2	2	2	2	0	1.8
191	49	1	0	0	0	1	0	0	0	0	0	1	0	0	0	1	0	0	0	0	0	0	0	0	0	0	0	0	0	0	0	0
192	44	50	55	40	47	37	45	60	50	44	38	2	2	2	2	2	2	2	2	2	2	4	6	4	4	4	4	6	4	4	4	4.4
193	38	7	4	2	2	4	5	6	6	7	6	2	2	2	2	2	2	2	2	2	2	2	0	0	0	0	2	2	2	2	2	1.2
194	50	80	79	85	77	70	94	90	80	94	87	2	2	2	2	2	2	2	2	2	2	8	8	8	8	6	8	8	8	8	8	7.8
195	23	40	35	40	50	51	27	30	29	30	39	2	2	2	2	2	2	2	2	2	2	4	4	4	4	6	4	4	4	4	4	4.2
196	38	27	30	26	34	31	29	30	27	30	39	2	2	2	2	2	2	2	2	2	2	4	4	4	4	4	4	4	4	4	4	4
197	46	0	0	0	0	0	0	0	0	0	0	0	0	0	0	0	0	0	0	0	0	0	0	0	0	0	0	0	0	0	0	0
198	34	10	14	11	9	17	10	9	8	10	11	2	2	2	2	2	2	2	2	2	2	2	2	2	2	2	2	2	2	2	2	2
199	57	0	0	0	0	0	0	0	0	0	0	0	0	0	0	0	0	0	0	0	0	0	0	0	0	0	0	0	0	0	0	0
200	33	40	35	41	47	30	25	47	51	40	37	2	2	2	2	2	2	2	2	2	2	4	4	4	4	4	4	4	6	4	4	4.2
201	38	35	44	40	35	51	57	30	40	49	44	2	2	2	2	2	2	2	2	2	2	4	4	4	4	6	6	4	4	4	4	4.4
202	50	20	33	21	24	35	21	23	24	30	29	3	3	3	3	3	3	3	3	3	3	3	6	3	3	6	3	3	3	6	6	4.2
203	36	17	9	7	21	11	15	6	17	18	14	2	2	2	2	2	2	2	2	2	2	2	2	2	2	2	2	2	2	2	2	2
204	40	55	72	42	42	54	68	64	52	40	64	3	3	3	3	3	3	3	3	3	3	9	9	6	6	9	9	9	9	6	9	8.1
205	53	70	55	40	47	37	42	45	39	35	42	3	3	3	3	3	3	3	3	3	3	9	9	6	6	6	6	6	6	6	6	6.6
206	51	7	5	9	5	7	6	5	7	6	8	2	2	2	2	2	2	2	2	2	2	2	2	2	2	2	2	2	2	2	2	2
207	42	0	0	0	0	0	0	0	0	0	0	0	0	0	0	0	0	0	0	0	0	0	0	0	0	0	0	0	0	0	0	0
208	40	11	17	20	12	9	11	12	13	15	11	3	3	3	3	3	3	3	3	3	3	3	3	3	3	3	3	3	3	3	3	3
209	28	29	35	33	40	21	49	51	60	40	33	2	2	2	2	2	2	2	2	2	2	4	4	4	4	2	4	6	6	4	4	4.2
210	41	60	42	47	35	30	40	31	27	32	27	3	3	3	3	3	3	3	3	3	3	9	6	6	6	6	6	6	6	6	6	6.3
211	38	20	15	14	9	7	11	8	11	10	14	2	2	2	2	2	2	2	2	2	2	2	2	2	2	2	2	2	2	2	2	2
212	32	14	15	7	9	10	11	13	11	14	9	3	2	3	2	2	2	2	3	3	2	3	2	3	2	2	2	2	3	3	2	2.4
213	37	60	40	45	40	80	35	40	75	69	82	2	2	2	2	2	2	2	3	3	2	6	4	4	4	8	4	4	9	9	8	6
214	51	11	15	10	10	12	13	9	8	10	11	3	2	3	3	2	2	3	3	2	2	3	2	3	3	2	2	3	3	2	2	2.5
215	47	7	9	6	5	11	7	9	7	9	5	3	3	3	3	3	3	3	3	3	3	3	3	3	3	3	3	3	3	3	3	3
216	54	20	17	19	25	27	29	22	21	27	20	3	3	3	3	3	3	3	3	3	3	3	3	3	3	6	6	3	3	6	3	3.9
217	61	0	0	0	0	0	0	0	0	0	0	0	0	0	0	0	0	0	0	0	0	0	0	0	0	0	0	0	0	0	0	0
218	38	40	27	29	31	19	24	27	31	19	18	2	2	2	2	2	2	2	2	2	2	4	4	4	4	2	2	4	4	2	2	3.2
219	34	0	0	0	0	0	0	0	0	0	0	0	0	0	0	0	0	0	0	0	0	0	0	0	0	0	0	0	0	0	0	0
220	49	2	1	3	3	3	2	4	7	2	1	2	2	2	2	2	2	2	2	2	2	0	0	0	0	0	0	0	2	0	0	0.2
221	49	14	35	31	27	17	17	11	21	20	26	3	2	3	3	3	3	3	3	3	3	3	4	6	6	3	3	3	3	3	6	4
222	66	0	0	0	2	0	0	3	0	0	7	0	0	0	1	0	0	1	0	0	1	0	0	0	0	0	0	0	0	0	1	0.1
223	44	7	11	9	5	7	1	1	5	4	3	2	2	2	2	2	2	2	2	2	2	2	2	2	2	2	0	0	2	0	0	1.2
224	21	7	6	4	7	6	1	7	6	9	10	2	2	2	2	2	2	2	2	2	2	2	2	0	2	2	0	2	2	2	2	1.6
225	43	55	68	80	70	41	39	80	75	65	52	3	3	3	3	3	3	3	3	3	3	9	9	12	9	6	6	12	9	9	9	9
226	40	20	25	27	29	30	21	25	21	22	22	2	2	2	2	2	2	2	2	2	2	2	2	4	4	4	2	2	2	2	2	2.6
227	64	48	55	46	47	45	50	45	65	47	55	2	2	2	2	2	2	2	2	2	2	4	6	4	4	4	4	4	6	4	6	4.6
228	39	15	10	10	11	9	14	13	10	9	9	3	3	3	3	3	3	3	3	3	3	3	3	3	3	3	3	3	3	3	3	3
229	63	38	38	21	49	49	53	50	59	44	45	2	2	2	2	2	2	2	2	2	2	4	4	2	4	4	6	4	6	4	4	4.2
230	34	70	74	77	78	83	65	68	50	49	89	3	3	3	3	3	3	3	3	3	3	9	9	12	12	12	9	9	6	6	12	9.6
231	47	51	60	50	44	67	71	75	76	60	55	3	3	3	3	3	3	2	2	2	3	9	9	6	6	9	9	6	8	6	9	7.7
232	51	46	42	40	47	52	50	42	39	52	55	3	3	3	3	3	3	3	3	3	3	6	6	6	6	9	6	6	6	9	9	6.9
233	51	8	7	6	9	6	5	17	39	25	27	3	3	3	3	3	3	2	2	3	3	3	3	3	3	3	3	2	2	3	6	3.1
234	46	0	0	0	0	0	0	0	0	0	0	0	0	0	0	0	0	0	0	0	0	0	0	0	0	0	0	0	0	0	0	0
235	32	21	19	27	25	24	31	19	11	10	14	2	2	2	2	2	2	2	2	2	2	2	2	4	2	2	4	2	2	2	2	2.4
236	52	15	16	17	11	10	9	11	17	12	15	3	3	3	3	3	3	3	3	3	3	3	3	3	3	3	3	3	3	3	3	3
237	32	74	5	60	47	42	51	57	66	70	50	2	2	3	3	3	3	2	2	2	2	6	2	9	6	6	9	6	6	6	2	5.8
238	50	7	10	9	8	8	7	6	11	7	5	3	3	3	3	3	3	3	3	3	3	3	3	3	3	3	3	3	3	3	3	3
239	43	7	5	9	5	7	7	10	9	6	5	3	3	3	3	3	3	3	3	3	3	3	3	3	3	3	3	3	3	3	3	3
240	65	20	25	21	19	27	20	21	18	23	21	2	2	2	2	2	2	2	2	2	2	2	2	2	2	4	2	2	2	2	2	2.2
241	54	11	17	9	8	15	16	8	7	11	10	2	2	2	2	2	2	2	2	2	2	2	2	2	2	2	2	2	2	2	2	2
242	42	18	17	21	15	19	24	15	13	21	29	2	2	2	2	2	2	2	2	2	2	2	2	2	2	2	2	2	2	2	4	2.2
243	41	5	7	11	6	3	10	11	9	5	4	2	2	2	2	2	2	2	2	2	2	2	2	2	2	0	2	2	2	2	0	1.6
244	67	7	10	5	4	11	12	4	7	9	14	3	3	3	3	3	3	3	3	3	3	3	3	3	0	3	3	0	3	3	3	2.4
245	53	15	11	17	12	12	10	17	9	16	11	2	2	2	2	2	2	2	2	2	2	2	2	2	2	2	2	2	2	2	2	2
246	51	35	17	34	37	35	29	41	40	17	40	3	3	3	3	2	3	3	3	2	3	6	3	6	6	4	6	6	6	2	6	5.1
247	42	80	60	47	57	44	51	49	60	58	66	3	3	3	3	3	3	3	3	3	3	12	9	6	9	6	9	6	9	9	9	8.4
248	40	50	45	45	40	37	35	40	51	52	40	2	2	2	2	2	2	2	2	2	2	4	4	4	4	4	4	4	6	6	4	4.4
249	50	5	7	6	6	4	7	8	7	9	9	2	2	2	2	2	2	2	2	2	2	2	2	2	2	0	2	2	2	2	2	1.8
250	72	3	7	5	4	2	1	1	2	5	3	3	3	3	3	3	3	3	3	3	3	0	3	3	0	0	0	0	0	3	0	0.9
251	39	60	65	70	55	47	72	66	65	64	60	3	3	3	3	3	3	3	3	3	3	9	9	9	9	6	9	9	9	9	9	8.7
252	45	11	12	10	7	11	9	10	12	12	13	3	3	3	3	2	2	3	3	2	2	3	3	3	3	2	2	3	3	2	2	2.6
253	26	17	11	7	5	14	15	11	9	8	12	2	2	2	2	2	2	2	2	2	2	2	2	2	2	2	2	2	2	2	2	2
254	47	5	7	6	4	2	3	1	1	6	5	3	3	3	3	3	3	3	3	3	3	3	3	3	0	0	0	0	0	3	3	1.5
255	31	35	21	30	24	15	20	21	27	25	26	3	3	2	2	2	3	2	2	2	2	6	3	4	2	2	3	2	4	2	4	3.2
256	41	58	74	84	90	70	68	81	90	65	62	3	3	3	3	3	3	3	3	3	3	9	9	12	12	9	9	12	12	9	9	10.2
257	46	81	82	85	78	89	86	72	87	91	82	3	3	3	3	3	3	3	3	3	3	12	12	12	12	12	12	9	12	12	12	11.7
258	35	55	60	70	58	42	40	38	41	39	47	2	3	2	2	2	3	3	3	3	3	6	9	6	6	4	6	6	6	6	6	6.1
259	29	1	2	2	3	1	0	1	1	1	2	2	2	2	2	2	0	2	2	2	2	0	0	0	0	0	0	0	0	0	0	0
260	43	11	12	6	7	14	11	9	8	9	11	2	2	2	3	2	2	2	2	2	2	2	2	2	3	2	2	2	2	2	2	2.1
261	36	50	51	45	55	50	57	42	45	49	52	3	3	3	3	3	3	3	3	3	3	6	9	6	9	6	9	6	6	6	9	7.2
262	50	40	32	45	27	51	60	54	32	60	65	3	3	3	3	3	3	3	3	3	3	6	6	6	6	6	9	9	6	9	9	7.2
263	49	19	23	15	11	17	18	16	14	12	12	3	3	3	3	3	3	3	3	3	3	3	3	3	3	3	3	3	3	3	3	3
264	52	62	35	47	50	51	60	47	49	39	37	3	3	3	3	3	3	3	3	3	3	9	6	6	6	9	9	6	6	6	6	6.9
265	51	75	65	47	68	60	73	75	61	52	77	3	3	3	3	3	3	3	3	3	3	9	9	6	9	9	9	9	9	9	12	9
266	34	40	35	42	50	55	35	42	47	40	33	3	3	3	3	3	3	3	3	3	3	6	6	6	6	9	6	6	6	6	6	6.3
267	48	7	5	4	6	8	6	6	5	4	4	2	2	2	2	2	2	2	2	2	2	2	2	0	2	2	2	2	2	0	0	1.4
268	31	15	12	11	15	14	7	9	11	6	14	3	3	3	3	3	3	3	3	3	3	3	3	3	3	3	3	3	3	3	3	3
269	48	2	11	2	1	1	1	1	1	1	1	3	2	2	2	3	3	2	2	2	3	0	2	0	0	0	0	0	0	0	0	0.2
270	41	30	45	47	42	55	40	37	29	30	35	3	3	3	3	3	3	3	3	3	3	6	6	6	6	9	6	6	6	6	6	6.3
271	55	25	47	35	40	35	52	55	60	42	50	3	3	3	2	2	2	3	3	2	2	3	6	6	4	4	6	9	9	4	4	5.5
272	38	7	11	5	4	12	11	10	7	8	8	3	3	3	3	3	3	3	3	3	3	3	3	3	0	3	3	3	3	3	3	2.7
273	43	58	54	27	19	26	47	16	17	9	21	2	2	2	2	2	3	3	3	3	3	6	6	4	2	4	6	3	3	3	3	4
274	47	15	7	19	10	5	3	11	12	8	9	2	2	2	2	2	2	2	2	2	2	2	2	2	2	2	0	2	2	2	2	1.8
275	42	1	1	1	2	1	1	1	1	1	1	2	2	2	2	2	2	2	2	2	2	0	0	0	0	0	0	0	0	0	0	0
276	49	7	5	4	5	3	2	1	2	5	6	3	3	3	3	3	3	3	3	3	3	3	3	0	3	0	0	0	0	3	3	1.5
277	27	5	7	4	11	12	7	6	14	11	9	2	2	2	2	2	2	2	2	2	2	2	2	0	2	2	2	2	2	2	2	1.8
278	44	44	51	31	34	35	27	31	30	35	29	2	2	2	2	2	2	2	2	2	2	4	6	4	4	4	4	4	4	4	4	4.2
279	30	7	7	81	85	74	66	70	79	81	87	2	2	2	3	3	2	2	3	3	3	2	2	8	12	9	6	6	12	12	12	8.1
280	30	33	27	32	30	25	34	34	31	32	30	3	3	3	3	3	3	3	3	3	3	6	6	6	6	3	6	6	6	6	6	5.7
281	54	55	47	42	33	52	42	40	45	47	55	3	3	3	3	3	3	3	3	3	3	9	6	6	6	9	6	6	6	6	9	6.9
282	54	5	7	0	2	1	7	8	7	5	4	1	1	0	1	2	1	1	1	1	1	1	1	0	0	0	1	1	1	1	0	0.6
283	41	76	91	82	90	87	85	92	90	91	88	2	3	2	2	2	2	2	2	2	2	8	12	8	8	8	8	8	8	8	8	8.4
284	54	80	79	81	82	77	72	9	85	84	82	3	3	3	3	3	3	3	3	3	3	12	12	12	12	12	9	3	12	12	12	10.8
285	41	4	7	13	13	17	10	7	4	15	15	2	2	2	2	2	2	2	2	2	2	0	2	2	2	2	2	2	0	2	2	1.6
286	36	66	60	30	34	47	67	52	35	37	36	3	3	3	3	3	3	3	3	3	3	9	9	6	6	6	9	9	6	6	6	7.2
287	40	23	35	29	41	28	33	35	21	19	24	3	3	3	3	3	3	3	3	3	3	3	6	6	6	6	6	6	3	3	3	4.8
288	40	21	17	19	27	9	17	11	10	12	15	3	3	3	3	3	3	3	3	3	3	3	3	3	6	3	3	3	3	3	3	3.3
289	38	77	60	55	82	85	75	79	89	70	65	3	3	3	3	3	3	3	3	3	3	12	9	9	12	12	9	12	12	9	9	10.5
290	45	55	17	19	27	9	11	17	10	12	19	3	3	3	3	3	3	3	3	3	3	9	3	3	6	3	3	3	3	3	3	3.9
291	38	9	7	7	6	9	7	6	6	9	8	3	3	3	3	3	3	3	3	3	3	3	3	3	3	3	3	3	3	3	3	3
292	54	42	35	40	29	51	27	30	25	35	37	3	3	3	3	3	3	3	3	3	3	6	6	6	6	9	6	6	3	6	6	6
293	25	4	11	9	11	10	6	5	2	3	5	3	3	3	3	3	3	3	3	3	3	0	3	3	3	3	3	3	0	0	3	2.1
294	62	0	0	0	0	0	0	0	0	0	0	0	0	0	0	0	0	0	0	0	0	0	0	0	0	0	0	0	0	0	0	0
295	42	39	31	35	22	17	14	15	20	33	31	3	3	3	3	3	3	3	3	3	3	6	6	6	3	3	3	3	3	6	6	4.5
296	43	20	15	9	10	4	2	7	5	9	4	3	3	3	3	3	3	3	3	3	3	3	3	3	3	0	0	3	3	3	0	2.1
297	38	11	9	8	10	7	5	7	6	4	3	3	3	3	3	2	3	3	3	3	3	3	3	3	3	2	3	3	3	0	0	2.3
298	32	4	0	1	2	5	3	4	4	7	4	3	0	3	3	3	3	3	3	3	3	0	0	0	0	3	0	0	0	3	0	0.6
299	33	1	2	3	1	1	0	1	2	1	0	3	2	3	3	3	0	3	3	3	0	0	0	0	0	0	0	0	0	0	0	0
300	43	0	0	0	0	0	0	0	0	0	0	0	0	0	0	0	0	0	0	0	0	0	0	0	0	0	0	0	0	0	0	0
301	42	0	0	0	0	0	0	0	0	0	0	0	0	0	0	0	0	0	0	0	0	0	0	0	0	0	0	0	0	0	0	0
302	49	0	0	0	0	0	0	0	0	0	0	0	0	0	0	0	0	0	0	0	0	0	0	0	0	0	0	0	0	0	0	0
303	53	0	0	0	0	0	0	0	0	0	0	0	0	0	0	0	0	0	0	0	0	0	0	0	0	0	0	0	0	0	0	0
304	31	26	30	17	11	10	19	25	20	18	17	2	2	2	2	2	2	2	2	2	2	4	4	2	2	2	2	2	2	2	2	2.4
305	35	31	29	44	31	22	20	29	38	21	19	2	2	2	2	2	2	2	2	2	2	4	4	4	4	2	2	4	4	2	2	3.2
306	55	40	45	37	52	50	45	54	41	35	37	3	3	3	3	3	3	3	3	3	3	6	6	6	9	6	6	9	6	6	6	6.6
307	34	0	0	0	0	0	0	0	0	0	0	0	0	0	0	0	0	0	0	0	0	0	0	0	0	0	0	0	0	0	0	0
308	46	44	51	40	37	60	35	55	45	32	33	2	2	2	2	2	2	2	2	2	2	4	6	4	4	6	4	6	4	4	4	4.6
309	43	1	0	0	2	0	0	1	1	0	0	3	0	0	3	0	0	3	3	0	0	0	0	0	0	0	0	0	0	0	0	0
310	44	31	27	25	19	17	16	19	21	22	25	3	3	3	3	3	3	3	3	3	3	6	6	3	3	3	3	3	3	3	3	3.6
311	46	1	0	0	1	1	0	0	0	0	1	3	0	0	3	3	0	0	0	0	3	3	0	0	3	3	0	0	0	0	3	1.2
312	51	27	21	26	19	15	20	29	15	19	18	2	2	2	2	2	2	2	2	2	2	4	2	4	2	2	2	4	2	2	2	2.6
313	50	0	0	0	0	0	0	0	0	0	0	0	0	0	0	0	0	0	0	0	0	0	0	0	0	0	0	0	0	0	0	0
314	36	0	0	0	0	0	0	0	0	0	0	0	0	0	0	0	0	0	0	0	0	0	0	0	0	0	0	0	0	0	0	0
315	51	40	47	52	39	40	57	42	46	48	38	2	2	2	2	2	2	2	2	2	2	4	4	6	4	4	6	4	4	4	4	4.4
316	38	47	27	19	14	11	31	10	12	9	15	3	3	3	3	3	3	3	3	3	3	6	6	3	3	3	6	3	3	3	3	3.9
317	37	80	90	85	87	77	81	83	75	70	91	2	2	2	2	2	2	2	2	2	2	8	8	8	8	8	8	8	6	6	8	7.6
318	69	50	55	42	56	61	67	62	55	54	49	3	3	3	3	3	3	3	3	3	3	6	9	6	9	9	9	9	9	9	6	8.1
319	52	70	69	55	4	76	47	52	55	70	69	3	3	3	3	3	3	3	3	3	3	9	9	9	0	12	6	9	9	9	9	8.1
320	48	14	11	9	8	15	7	10	6	11	9	3	3	3	3	3	3	3	3	3	3	3	3	3	3	3	3	3	3	3	3	3
321	64	17	10	9	7	15	13	7	4	5	5	2	2	2	2	2	2	2	2	2	2	2	2	2	2	2	2	2	0	2	2	1.8
322	66	55	61	50	42	65	67	58	57	45	42	3	3	3	3	3	3	3	3	3	3	9	9	6	6	9	9	9	9	6	6	7.8
323	51	5	4	4	4	1	3	7	4	3	2	2	2	2	2	2	2	2	2	2	2	2	0	0	0	0	0	2	0	0	0	0.4
324	43	40	30	17	45	40	30	35	30	40	41	2	2	2	2	1	1	1	2	2	2	4	4	2	4	2	2	2	4	4	4	3.2
325	42	55	90	62	85	77	60	47	88	70	72	3	3	3	3	3	3	3	3	3	3	9	12	9	12	12	9	6	12	9	9	9.9
326	50	55	30	67	25	3	42	49	30	26	31	3	3	3	3	3	3	3	3	3	3	9	6	9	3	3	6	6	6	6	6	6
327	33	47	21	15	19	20	27	14	13	18	21	3	3	3	3	3	3	3	3	3	3	6	3	3	3	3	6	3	3	3	3	3.6
328	21	5	11	7	2	2	4	3	5	7	6	2	1	1	2	1	1	1	2	2	1	2	1	1	0	0	0	0	2	2	1	0.9
329	48	40	29	37	20	30	35	31	32	35	29	3	3	3	3	3	3	3	3	3	3	6	6	6	3	6	6	6	6	6	6	5.7
330	42	7	0	0	8	0	11	5	4	0	3	2	0	0	2	0	2	2	2	0	2	2	0	0	2	0	2	2	0	0	0	0.8
331	24	2	1	0	4	5	1	2	1	1	2	3	3	0	3	3	3	3	3	3	3	0	0	0	0	3	0	0	0	0	0	0.3
332	41	0	0	0	0	0	0	0	0	0	0	0	0	0	0	0	0	0	0	0	0	0	0	0	0	0	0	0	0	0	0	0
333	50	0	0	0	0	0	0	0	0	0	0	0	0	0	0	0	0	0	0	0	0	0	0	0	0	0	0	0	0	0	0	0
334	46	35	52	55	27	35	47	30	32	42	30	3	3	3	3	3	3	3	3	3	3	6	9	9	6	6	6	6	6	6	6	6.6
335	50	7	4	5	3	7	3	3	2	5	6	1	1	1	1	1	1	1	1	1	1	1	0	1	0	1	0	0	0	1	1	0.5
336	44	3	5	0	4	3	2	4	3	5	4	1	1	0	1	1	1	1	1	1	1	0	1	0	0	0	0	0	0	1	0	0.2
337	59	11	14	12	7	9	11	21	14	6	7	3	3	3	3	3	3	3	2	3	3	3	3	3	3	3	3	3	2	3	3	2.9
338	30	9	11	10	14	21	14	30	9	10	11	2	2	2	2	2	2	2	2	2	2	2	2	2	2	2	2	4	2	2	2	2.2
339	30	30	29	35	25	21	27	20	30	55	24	3	3	3	3	3	3	3	3	2	3	6	6	6	3	3	6	3	6	6	3	4.8
340	42	1	2	1	1	4	3	1	2	2	3	3	3	3	3	3	1	2	3	2	3	0	0	0	0	0	0	0	0	0	0	0
341	50	7	11	10	8	7	2	6	10	5	4	3	3	3	3	3	3	3	3	3	3	3	3	3	3	3	0	3	3	3	0	2.4
342	42	1	2	0	2	1	2	3	2	0	1	3	3	0	2	2	2	2	2	0	2	0	0	0	0	0	0	0	0	0	0	0
343	45	1	0	1	3	0	0	2	1	2	2	2	0	2	2	0	0	2	2	2	2	0	0	0	0	0	0	0	0	0	0	0
344	41	7	8	5	9	8	5	7	6	7	5	2	2	2	2	2	2	2	2	2	2	2	2	2	2	2	2	2	2	2	2	2
345	65	35	41	47	40	27	50	25	21	22	19	3	3	3	3	3	3	3	3	3	3	6	6	6	6	6	6	3	3	3	3	4.8
346	47	37	44	25	30	21	20	21	25	26	27	3	3	3	3	3	3	3	3	3	3	6	6	3	6	3	3	3	3	6	6	4.5
347	37	1	4	0	3	5	6	0	2	7	6	2	2	0	2	1	1	0	2	1	1	0	0	0	0	1	1	0	0	1	1	0.4
348	37	24	30	35	21	14	12	17	30	19	18	2	2	2	2	2	2	2	2	2	2	2	4	4	2	2	2	2	4	2	2	2.6
349	20	11	9	17	20	11	15	12	8	10	11	3	3	3	3	3	3	3	3	3	3	3	3	3	3	3	3	3	3	3	3	3
350	30	4	5	3	3	2	1	3	4	1	1	3	2	2	3	2	2	3	2	3	2	0	2	0	0	0	0	0	0	0	0	0.2
351
352
353
354
355
356
357
358
359
360
361
362
363
364
365
366
367
368
