# Supplementary material for: Combining HPV DNA load with p16/Ki-67 staining to detect cervical precancerous lesions and predict the progression of CIN1–2 lesions
Source: Virol J. 2019 Oct 16;16:117. doi: 10.1186/s12985-019-1225-6 (PMC6794830; doi:10.1186/s12985-019-1225-6)
Supplement: Supplementary file 2 — Additional file 2: Table S2. The data of the p16/Ki-67/HPV co-test to predict the progression of CIN1 and CIN2 for the 48 cases. [file 12985_2019_1225_MOESM2_ESM.xlsx]

## Sheet: Sheet1
Serial number	Patient number	Patient year	Initial diagnosis		Immunostaining score		Return visit result			Prediction for the behavior of lesion
			HPV infection (HPV load)	Histopathology diagnosis	p16 score	Ki-67 score	Histopathological diagnosis	Intrval time (month)	Whether lesions regression (Yes/No)	Prediction method	Positivity/Negativity
1	5	48	HPV-58 (0.06)	CIN1	4	1.8	CIN2	3	No	p16/Ki-67/HPV load	P
2	11	38	HPV-52 (0.043)	CIN1	8.4	2.4	normal	3	Yes	p16/Ki-67	P
3	19	54	no infection	CIN2	2.6	2.8	normal	1.5	Yes	p16/Ki-67	P
4	25	42	HPV-52 (4.199)	CIN2	7.1	6.8	CIN2	4	No	p16	P
5	27	43	HPV-52 (0.177)	CIN2	0	6.3	CIN2	3	No	p16	N
6	34	52	HPV-58 (0.008)	CIN1	3.9	11.7	cervicitis	6	Yes	p16/Ki-67/HPV load	P
7	41	53	HPV-58 (16.338)	CIN2	11.4	3.8	CIN3	3	No	p16/Ki-67/HPV load	P
8	47	23	no infection	CIN2	10	2.4	cervicitis	3	Yes	p16/Ki-67	P
9	70	46	HPV-16 (0.637); HPV-52 (0.13)	CIN1	0	2	CIN1-2	12	No	p16/Ki-67/HPV load	N
10	88	44	HPV-52 (0.001); HPV-58 (0.01)	CIN1	0	2	cervicitis	1	Yes	p16/Ki-67/HPV load	N
11	89	24	HPV-58 (0.319)	CIN2, gland involved	2	2.2	cervicitis	6	Yes	p16/Ki-67/HPV load	N
12	94	54	HPV-16 (2.329)	CIN1	0	3	CIN1	9	No	p16/Ki-67/HPV load	P
13	101	40	HPV-56 (44.017)	CIN1	0	2.5	cervicitis	13	Yes	p16/Ki-67	N
14	110	36	HPV-58 (0.096); HPV-68 (0.00034); HPV-51 (0.00034)	focal CIN2	0.6	0.1	cervicitis	1	Yes	p16/Ki-67/HPV load	N
15	114	33	HPV-51 (0.262)	focal CIN2	2.8	2	cervicitis	2	Yes	p16	P
16	122	45	HPV-18 (0.071)	CIN2	8.8	1.3	CIN1	2.5	Yes	p16	P
17	123	41	HPV-58 (0.193)	focal CIN1	0	0.4	normal	2	Yes	p16/Ki-67/HPV load	N
18	149	48	HPV-18 (0.22); HPV-52 (0.008)	CIN2	2.6	3.5	CIN1	3	Yes	p16	P
19	163	39	HPV-58 (4.141)	CIN2, cervicitis	0	8.4	cervicitis	4.5	Yes	p16/Ki-67/HPV load	P
20	170	47	HPV-59 (0.463)	CIN2	0	1.4	CIN1	2.5	Yes	p16	N
21	172	35	HPV-33 (0.697)	focal CIN2	0.7	2.4	CIN2	4	No	p16	P
22	173	45	HPV-16 (0.31)	focal CIN2, gland involved	5.2	2	CIN3	2	No	p16/Ki-67/HPV load	P
23	178	46	HPV-56 (0.005); HPV-39 (0.001)	CIN1	0	3	CIN1	1	No	p16/Ki-67	P
24	188	58	HPV-52 (0.25); HPV-35 (0.06)	focal CIN2	1.9	2	CIN2-3	1	No	p16	N
25	203	36	HPV-16 (0.0003); HPV-59 (34.506)	CIN1	0	2	normal	4	Yes	p16/Ki-67/HPV load	N
26	208	40	HPV-35 (0.133)	cervicitis, CIN1	0.1	3	normal	5.5	Yes	p16/Ki-67	P
27	216	54	HPV-16 (0.074); HPV-52 (0.013)	CIN1	0	3.9	normal	6	Yes	p16/Ki-67/HPV load	P
28	218	38	HPV-16 (3.16)	focal CIN2	11.2	3.2	cervicitis	1.5	Yes	p16/Ki-67/HPV load	P
29	219	34	HPV-16 (0.015); HPV-31 (0.33); HPV-52 (0.003)	CIN1	0	0	normal	3	Yes	p16/Ki-67/HPV load	N
30	232	51	HPV-58 (3.03)	CIN2	12	6.9	CIN1	7	Yes	p16/Ki-67/HPV load	P
31	237	32	HPV-16 (12.996)	CIN2	11.2	5.8	CIN2-3	3	No	p16/Ki-67/HPV load	P
32	240	65	HPV-35 (31.559)	focal CIN2	12	2.2	CIN2-3	4	No	p16	P
33	253	26	HPV-16 (0.31)	focal CIN1	0	2	cervicitis	4	Yes	p16/Ki-67/HPV load	N
34	260	43	HPV-58 (71.012)	CIN2	7.8	2.1	CIN3	1	No	p16/Ki-67/HPV load	P
35	277	27	HPV-39 (9.25)	CIN2	3	1.8	cervicitis	2	Yes	p16	P
36	278	44	no infection	CIN2	6.2	4.2	CIN2	4	No	p16/Ki-67	P
37	294	62	HPV-16 (0.07)	focal CIN2	0	0	CIN1	3.5	Yes	p16/Ki-67/HPV load	N
38	297	38	HPV-16 (83.286)	focal CIN2	6.3	2.3	focal CIN2	4	No	p16/Ki-67/HPV load	P
39	301	42	HPV-16 (0.081); HPV-18 (0.001); HPV-52 (0.00001)	focal CIN1	0	0	normal	1	Yes	p16/Ki-67/HPV load	N
40	302	49	HPV-16 (0.678); HPV-52 (9.448); HPV-58 (17.631); HPV-68 (6.06); HPV-51 (0.21)	focal CIN1	0.6	0	cervicitis	4	Yes	p16/Ki-67/HPV load	P
41	316	38	HPV-16 (0.426); HPV-52 (4.287)	CIN1	4.1	3.9	cervicitis	1	Yes	p16/Ki-67/HPV load	P
42	332	41	HPV-52 (0.616); HPV-58 (32)	CIN2	9.9	0	CIN2	3	No	p16/Ki-67/HPV load	P
43	335	50	HPV-16 (0.63)	CIN1	0	0.5	CIN1	2	No	p16/Ki-67/HPV load	N
44	336	44	HPV-58 (0.067)	CIN1	0	0.2	CIN1	4	No	p16/Ki-67/HPV load	N
45	338	30	no infection	CIN1	0	2.2	CIN1	3	No	p16/Ki-67	P
46	339	30	no infection	CIN2	7.2	4.8	CIN1	2	Yes	p16/Ki-67	P
47	347	37	HPV-33 (62.683)	CIN2	12	0.4	CIN1	3.5	Yes	p16	P
48	348	37	HPV-33 (36.5)	CIN1	12	2.6	CIN2	3	No	p16/Ki-67	P
